# Supplementary material for: Methane in groundwater before, during, and after hydraulic fracturing of the Marcellus Shale
Source: PubMed Central journal article supplement — Proc Natl Acad Sci U S A. 2018 Jun 18;115(27):6970–5. doi: 10.1073/pnas.1720898115 (PMC6142237; doi:10.1073/pnas.1720898115), 2018-06-18
Supplement: pnas.1720898115.sapp.pdf [file pnas.1720898115.sapp.pdf]

## 1 **Supporting Information**

### 2 **Hydrogeology and Methane Occurrence**

3 Monitoring wells were installed in the two major Upper Devonian (UD) bedrock aquifers in the  
4 study area: the Catskill Formation and the underlying Lock Haven Formation. These formations,  
5 originally deposited in the late Devonian as part of the Catskill Alluvial Plain (1), have been  
6 buried and uncovered since as a result of orogenic and glacial events. These are, therefore,  
7 naturally fractured, dual-porosity aquifers close to the surface, and covered in some areas by  
8 unconsolidated sedimentary or glacial alluvium (2, 3). Water yield from domestic drinking water  
9 wells is higher in wells with fractures (3), indicating that fracture flow dominates flow patterns in  
10 these aquifers. Water table variability in the region is inversely correlated to temperature, rather  
11 than precipitation, and most recharge occurs after the spring thaw and in October, following first  
12 frost and prior to the ground freezing (3). In the shallow subsurface, groundwater flow is  
13 dominated by local flow systems (hilltop recharge zones and adjacent valley discharge zones),  
14 and the regional flow system, that underlies smaller local flow systems, is governed by a  
15 hydraulic gradient from south to north, and discharges in the Susquehanna River.

16 Stratigraphy in the UD is a series of interbedded sandstone, siltstone, and shale. Though some  
17 shales are known to comprise the UD (4) and generate natural gas in non-commercial volumes  
18 (5), the two economic gas production units that are thought to originate most of the stray  
19 thermogenic methane in the region include: 1) Ordovician/Silurian hydrocarbon traps hosting  
20 migrated hydrocarbons from Ordovician shales, and 2) Middle Devonian “tight gas” black  
21 shales, including the Marcellus Shale (2, 6, 7). It is thought that thermogenic methane, known to  
22 be present in the overlying UD aquifers and unrelated to SGD, genetically originated from one of  
23 these two economic sources, and has migrated towards the surface over geologic time (2).  
24 Conceptual models for migration include primary, secondary, and tertiary migration. Primary  
25 migration would be movement of the hydrocarbons out of source rock, and, in some cases, into  
26 an unconventional well. Secondary migration is the movement of hydrocarbons from the source  
27 rock to a structural trap. Tertiary migration is the movement of hydrocarbons away from  
28 structural traps, often induced by tectonic and climatic factors (2). Migration of gases through the  
29 subsurface can lead to changes in chemical (decrease in longer chain hydrocarbon  
30 concentrations) and isotopic composition owing to diffusive or solubility fractionation (8), and  
31 observations of gas shows in the UD have demonstrated a gradually depleted, though still  
32 thermogenic, signature (from -32.46 to -43.53 ‰) as distance to the surface decreases (5).

33 Sedimentary sequences of Upper Devonian bedrock dip approximately 1 to 3 degrees to the east  
34 and south (9). In this region, and elsewhere, it has been shown that regional stress regimes  
35 exhibit control on permeability in fractured rock terrains. In particular, normal faults and  
36 topographic lineaments generally oriented in the NNE-SSW direction in this region have been  
37 shown to be associated with the Cl-Br signatures of Appalachian Basin Brine (10). In addition,  
38 valley stress relief has led to fractures that can enhance vertical transport of ABB within valleys  
39 (3, 11). Within this region it is known that thermogenic methane can be naturally occurring, and  
40 that the highest concentrations of thermogenic methane occur in valley settings where the water  
41 well was completed in bedrock, and the bedrock well is confined on the surface by sedimentary

42 or glacial till (12). It is thought that the enhanced methane concentrations in these valley wells  
43 are related to vertical stress-relief fracturing, the closer proximity to the methane-laced ABB, and  
44 the confining sediment preventing methane from degassing to the atmosphere.

#### 45 **Monitoring Well Installation**

46 Groundwater monitoring wells (MWs) were sited to investigate water quality and hydrologic  
47 changes during a two year period in which seven shale gas wells were drilled, hydraulically  
48 fractured, and entered production (Figure 1). The MWs were located on private properties, and  
49 well placement was contingent on landowner permission, which placed some constraints on well  
50 locations. Landowner agreements allowed for unregulated access to the monitoring wells, and  
51 landowners were compensated in the amount of \$1000.

52 Vertical portions of gas wells targeting the Marcellus Shale in this study are drilled to depths of  
53 ~2000 m, and the average depth of drinking water wells is between 35 and 90 m (2, 3, 9). To  
54 drill the MWs, 10 cm steel casing was spun through unconsolidated material into the top of  
55 bedrock, whereupon the bedrock was cored to depths of 90 to 120 meters below ground surface  
56 with an HQ wireline coring system using potable water as the drilling fluid. Following drilling  
57 and coring, borehole geophysics and straddle packer tests were used to determine location and  
58 hydraulic conductivity, respectively, of fracture zones supplying water to the borehole. Borehole  
59 geophysics included temperature, conductivity, optical televiewer, acoustic televiewer, acoustic  
60 caliper, natural gamma ray, and heat-pulsed flow meter logging.

61 Solinst Waterloo 401 multi-level systems were installed in each borehole to isolate one to four  
62 fracture zones. This system consists of stainless steel sampling ports, each with dedicated  
63 pressure transducers and double-valve sampling pumps. The sampling ports draw water from 3-  
64 m intervals (zones) that are isolated by permanent packers. Attempts were made to distribute the  
65 ports over the entire depth of the bedrock portion of the borehole, while constraining placement  
66 to fracture zones that would yield water. In total, 24 screened intervals were installed in eight  
67 wells. Ports within each well were numbered from deepest to most shallow. For example, ports  
68 in well A were numbered consecutively starting with the deepest port, A1. Details on depths of  
69 wells and intervals are available in Table S1.

#### 70 **Sampling Methodology and Sample Analyses**

71 Samples were collected via the low-flow purging and sampling method in which groundwater is  
72 purged from sampling equipment, and then water is pumped at a rate <1L/min while monitoring  
73 field parameters for stabilization (13). Low-flow purging and sampling has been shown to be  
74 effective in wells with short screens and dedicated pumps (14), similar to the Waterloo 401  
75 system. Following purging of the sampling equipment, groundwater was pumped at a rate  
76 between 0.1 and 0.3 L/min while temperature, pH, DO, and specific conductance were monitored  
77 at three minute intervals. When parameters stabilized across three time intervals, samples were  
78 collected. Pressure data were collected continuously on an hourly basis from the time of well  
79 installation. Samples were collected on a bi-weekly basis through July 2015, and continued, on  
80 approximately a monthly basis, through May of 2017. From January 2015 to May 2017, 542  
81 groundwater samples were collected, and each of the 24 intervals was sampled between 20 and  
82 25 times. All samples collected were analyzed for methane and ethane concentrations, major  
83 anions, major cations, trace metals, dissolved inorganic carbon (DIC), and dissolved organic

84 carbon (DOC). A subset of samples were analyzed for stable carbon isotopes of methane,  $\delta^{13}\text{C}$ -  
85  $\text{C}_2\text{H}_6$ ,  $\delta^{13}\text{C}$  -DIC,  $^{87}\text{Sr}/^{86}\text{Sr}$ ,  $\delta^2\text{H}$ - $\text{H}_2\text{O}$ ,  $\delta^{18}\text{O}$ - $\text{H}_2\text{O}$ ,  $^3\text{H}$  and CFC/ $\text{SF}_6$  concentrations for dating.

86 Dissolved hydrocarbon samples were collected via the direct-fill method in 60-mL VOA vials  
87 with Teflon-lined septa and preserved with 1:1 HCl to a pH <2. The direct-fill method from  
88 Waterloo 401 sampling tubing likely leads to underestimation of methane concentrations near  
89 methane saturation level at atmospheric pressure (25-30 mg/L) as there is no option to use a  
90 back-pressure regulator in this system (15). Therefore, the decrease in pressure from formation  
91 depth to the surface may allow for degassing of methane from saturated samples. Processing of  
92 samples by creating headspaces and transferring the headspace to exetainers was accomplished  
93 <7 days after collection. Filled exetainers were stored in water prior to analysis. Total and  
94 dissolved metals and cation samples were collected in 125-mL HDPE bottles and preserved with  
95 1% 1:1  $\text{HNO}_3$ . Dissolved metal and cation samples were filtered using an in-line filter and 0.45  
96  $\mu\text{m}$  filter membrane. Anion samples were also filtered in-line using a 0.45  $\mu\text{m}$  membrane, and  
97 frozen. Dissolved inorganic carbon and dissolved organic carbon samples were collected in glass  
98 vials without headspace and in-line filtered using a 0.2  $\mu\text{m}$  membrane.

99 Methane and ethane concentrations were determined using a modified version of RSK-175  
100 standard operating procedure (16, 17). The procedure was modified in that there was a 20-mL  
101 headspace added to the 60-mL VOA vial. Headspace samples were then analyzed using GC-FID.  
102 Samples found to have a dissolved methane concentration  $\geq 0.01$  mg/L were sent to UC Davis  
103 Stable Isotope Facility for analysis of  $\delta^{13}\text{C}$ - $\text{CH}_4$  and  $\delta^2\text{H}$ - $\text{CH}_4$ . In some cases, where results  
104 warranted it, lower  $[\text{CH}_4]$  samples were sent for  $\delta^{13}\text{C}$ - $\text{CH}_4$ , but results could not always be  
105 obtained for these lower concentrations. Samples with  $\geq 0.001$  mg/L ethane were analyzed for  
106  $\delta^{13}\text{C}$ - $\text{C}_2\text{H}_6$  by Woods Hole Isotope Laboratories. Anion concentrations were determined using  
107 suppressed ion chromatography. Cation and iron analyses were performed using ICP-OES, and  
108 trace metals concentrations were determined using standard addition method (18) with ICP-MS.  
109 Strontium isotopes were measured on a Thermo-Finnegan Multi-Collector ICP-MS, and the  
110 mean  $^{87}\text{Sr}/^{86}\text{Sr}$  of Standard Reference Material-987 equaled  $0.71026 \pm 0.000004$  (SD). Water  
111 isotopes were analyzed with a High Temperature Conversion Elemental Analyzer connected to a  
112 Thermo Delta Plus Advantage Isotope Ratio Mass Spectrometer. Samples were analyzed along  
113 with calibrated reference materials on the SMOW scale. Instrument precision is  $\pm 2$  ‰ and  $\pm 0.2$   
114 ‰ for hydrogen and oxygen respectively. DIC and DOC concentrations were analyzed using a  
115 Shimadzu TOC-V.  $\delta^{13}\text{C}$  -DIC were analyzed on a GasBench II coupled to a Thermo Delta Plus  
116 Advantage IRMS.  $\delta^{13}\text{C}$  -DIC samples are analyzed using calibrated in house standards on the  
117 PDB scale. Tritium, CFC, and  $\text{SF}_6$  samples were analyzed by University of Miami School of  
118 Marine and Atmospheric Science.

119 **Table S1.** Monitoring well topographic location and land-surface elevation; bedrock and water-table depth at monitoring wells; and  
 120 sampling port depths and elevations.

| <b>Well</b> | <b>Topographic Location</b> | <b>Distance to Center of Closest Gas Well Pad</b> | <b>Elevation of Closest Gas Well Pad (m)</b> | <b>Monitoring Well Elevation above sea level (m)</b> | <b>Depth to consolidated bedrock (m)</b> | <b>Water table depth after borehole completion BGS (m)</b> | <b>Port</b> | <b>Port depth BGS (m)</b> | <b>Port elevation above sea level (m)</b> | <b>Interval Hydraulic Conductivity* (cm/s)</b> |
|-------------|-----------------------------|---------------------------------------------------|----------------------------------------------|------------------------------------------------------|------------------------------------------|------------------------------------------------------------|-------------|---------------------------|-------------------------------------------|------------------------------------------------|
| <b>A</b>    | valley                      | 920 m from center of well pad 2                   | 470                                          | 395.7                                                | 34.2                                     | 18.3                                                       | A1          | 78.6                      | 317.1                                     | 1.8E-5                                         |
|             |                             |                                                   |                                              |                                                      |                                          |                                                            | A2          | 65.3                      | 330.4                                     | 6.0E-4                                         |
|             |                             |                                                   |                                              |                                                      |                                          |                                                            | A3          | 48.4                      | 347.3                                     | 7.3E-4                                         |
|             |                             |                                                   |                                              |                                                      |                                          |                                                            | A4          | 40.9                      | 354.8                                     | 9.9E-4                                         |
| <b>B</b>    | hilltop                     | 64 m from center of well pad 3                    | 465                                          | 464                                                  | 8.1                                      | 43.5                                                       | B1          | 59.7                      | 404.0                                     | 5.4E-4                                         |
|             |                             |                                                   |                                              |                                                      |                                          |                                                            | B2          | 49.8                      | 413.9                                     | 3.2E-4                                         |
| <b>D</b>    | valley                      | 1147 m from center of well pad 3                  | 465                                          | 372                                                  | 32.8                                     | 6.3                                                        | D1          | 51.7                      | 319.9                                     | 4.7E-5                                         |
|             |                             |                                                   |                                              |                                                      |                                          |                                                            | D2          | 46.7                      | 324.9                                     | 2.9E-5                                         |
|             |                             |                                                   |                                              |                                                      |                                          |                                                            | D3          | 38.0                      | 333.6                                     | 4.6E-5                                         |
| <b>F</b>    | hilltop                     | 83 m from center of well pad 4                    | 498                                          | 498                                                  | 20.0                                     | 74.9                                                       | F0          | 101.3                     | 396.2                                     | 3.0E-4                                         |
| <b>H</b>    | valley                      | 1274 m from center of well pad 3                  | 465                                          | 301                                                  | 15.5                                     | 19.3                                                       | H1          | 90.3                      | 210.3                                     | 5.2E-6                                         |
|             |                             |                                                   |                                              |                                                      |                                          |                                                            | H2          | 64.5                      | 236.1                                     | ND                                             |

|          |         |                                           |     |     |      |      |    |      |       |        |
|----------|---------|-------------------------------------------|-----|-----|------|------|----|------|-------|--------|
| <b>L</b> | valley  | 1178 m<br>from center<br>of well pad<br>3 | 465 | 350 | 19.4 | 2.0  | L1 | 82.5 | 267.5 | 9.8E-5 |
|          |         |                                           |     |     |      |      | L2 | 61.6 | 288.4 | 6.2E-5 |
|          |         |                                           |     |     |      |      | L3 | 41.3 | 308.7 | 5.3E-5 |
|          |         |                                           |     |     |      |      | L4 | 23.5 | 326.5 | 3.8E-4 |
| <b>R</b> | hilltop | 96 m from<br>center of<br>well pad 1      | 492 | 492 | 32.1 | 39.5 | R1 | 95.6 | 396.5 | 4.3E-5 |
|          |         |                                           |     |     |      |      | R2 | 73.8 | 418.3 | 1.1E-4 |
|          |         |                                           |     |     |      |      | R3 | 61.1 | 431.0 | 2.6E-4 |
|          |         |                                           |     |     |      |      | R4 | 49.4 | 442.7 | 2.9E-5 |
| <b>O</b> | valley  | 1434 m<br>from center<br>of well pad<br>1 | 492 | 448 | 30.7 | 15.6 | O1 | 75.6 | 372.5 | 4.9E-4 |
|          |         |                                           |     |     |      |      | O2 | 63.9 | 384.3 | 1.5E-3 |
|          |         |                                           |     |     |      |      | O3 | 54.6 | 393.6 | 9.0E-6 |
|          |         |                                           |     |     |      |      | O4 | 43.8 | 404.4 | 3.4E-4 |

121 \*Hydraulic conductivity was measured for each interval using straddle packer tests.

122

123 **Table S2.** Well pad elevations; dates for top-hole drilling, lateral drilling, and completion; and casing details for the seven shale gas  
 124 wells monitored in this study. Gas wells are identified by the well pad number and direction the laterals extend away from the well  
 125 pad. Each gas well has its own top hole.

| <b>Gas well</b> | <b>Elevation of gas well pad (m above MSL)</b> | <b>Start date of tophole drilling</b> | <b>Start date of lateral drilling</b> | <b>Start date of HVHF</b> | <b>Conductor casing depth (m bgs)</b> | <b>Surface casing depth (m bgs)</b> | <b>Intermediate casing depth (m bgs)</b> | <b>Production casing measured depth (m)</b> | <b>Estimated Cement Top (m)<sup>1</sup></b> |
|-----------------|------------------------------------------------|---------------------------------------|---------------------------------------|---------------------------|---------------------------------------|-------------------------------------|------------------------------------------|---------------------------------------------|---------------------------------------------|
| <b>1 North</b>  | 492                                            | 1/14/2015                             | 3/6/2015                              | 6/27/2015                 | 53                                    | 193                                 | 490                                      | 4781                                        | 1137                                        |
| <b>1 South</b>  | 492                                            | 1/23/2015                             | 3/23/2015                             | 7/16/2015                 | 52                                    | 192                                 | 490                                      | 4825                                        | 573                                         |
| <b>2 North</b>  | 470                                            | 7/17/2015                             | 8/10/2015                             | 9/15/2015                 | 61                                    | 187                                 | 498                                      | 3480                                        | 830                                         |
| <b>2 South</b>  | 470                                            | 7/8/2015                              | 7/30/2015                             | 9/5/2015                  | 66                                    | 202                                 | 498                                      | 4601                                        | 769                                         |
| <b>3 North</b>  | 465                                            | 4/22/2015                             | 5/26/2015                             | 9/23/2015                 | 12                                    | 193                                 | 491                                      | 3457                                        | 623                                         |
| <b>3 South</b>  | 465                                            | 4/15/2015                             | 5/16/2015                             | 9/26/2015                 | 12                                    | 184                                 | 490                                      | 4276                                        | 653                                         |
| <b>4 South</b>  | 498                                            | 2/4/2015                              | 5/8/2015                              | 10/4/2015                 | 12                                    | 199                                 | 504                                      | 3972                                        | 678                                         |

126 <sup>1</sup>Estimated cement top is the depth of the top of the cement that fills the annular space surrounding the production casing.

127

128 **Table S3.** Distances of groundwater monitoring wells from center of the four gas well pads in  
 129 the study area.

| <b>Groundwater Monitoring Well</b> | <b>Gas Well Pad</b> | <b>Distance of MW to center of gas well pad (m)*</b> |
|------------------------------------|---------------------|------------------------------------------------------|
| A                                  | 2                   | 920                                                  |
| A                                  | 3                   | 2548                                                 |
| A                                  | 4                   | 3515                                                 |
| A                                  | 1                   | 4703                                                 |
| B                                  | 3                   | 64                                                   |
| B                                  | 4                   | 1241                                                 |
| B                                  | 2                   | 1904                                                 |
| B                                  | 1                   | 7152                                                 |
| D                                  | 3                   | 1147                                                 |
| D                                  | 4                   | 1359                                                 |
| D                                  | 2                   | 2853                                                 |
| D                                  | 1                   | 8240                                                 |
| F                                  | 4                   | 84                                                   |
| F                                  | 3                   | 1276                                                 |
| F                                  | 2                   | 3085                                                 |
| F                                  | 1                   | 7850                                                 |
| H                                  | 3                   | 1274                                                 |
| H                                  | 2                   | 1700                                                 |
| H                                  | 4                   | 2397                                                 |
| H                                  | 1                   | 7306                                                 |
| L                                  | 3                   | 1178                                                 |
| L                                  | 2                   | 1221                                                 |
| L                                  | 4                   | 1995                                                 |
| L                                  | 1                   | 5934                                                 |
| R                                  | 1                   | 96                                                   |
| R                                  | 2                   | 5520                                                 |
| R                                  | 3                   | 7026                                                 |
| R                                  | 4                   | 7697                                                 |
| O                                  | 1                   | 1434                                                 |
| O                                  | 2                   | 4226                                                 |
| O                                  | 3                   | 5824                                                 |
| O                                  | 4                   | 6594                                                 |

130 \* Distances calculated in ArcGIS using Geographic Coordinate System WGS 1984.

131

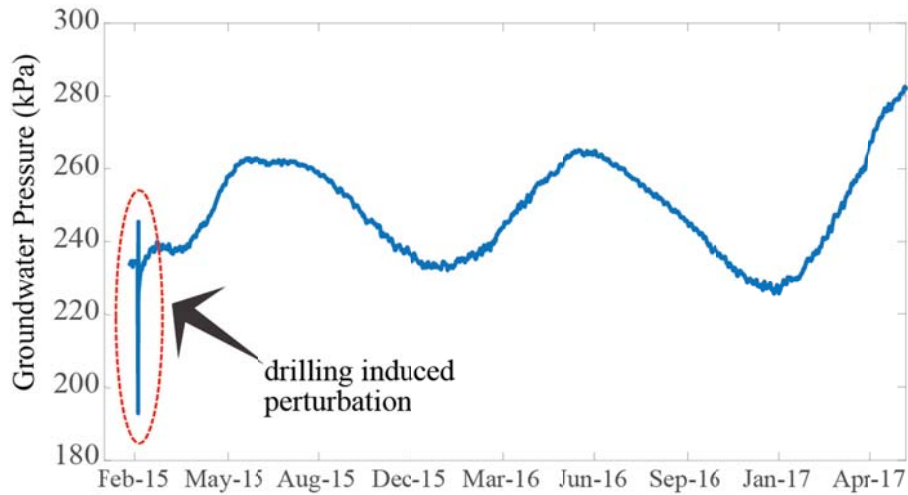

132

133 **Figure S1.** Measurements of groundwater pressure at the single sampling port of MW F. See  
 134 Table S1 for port elevation. The perturbation in groundwater pressure that occurred in response  
 135 to top-hole drilling is circled in red.

136

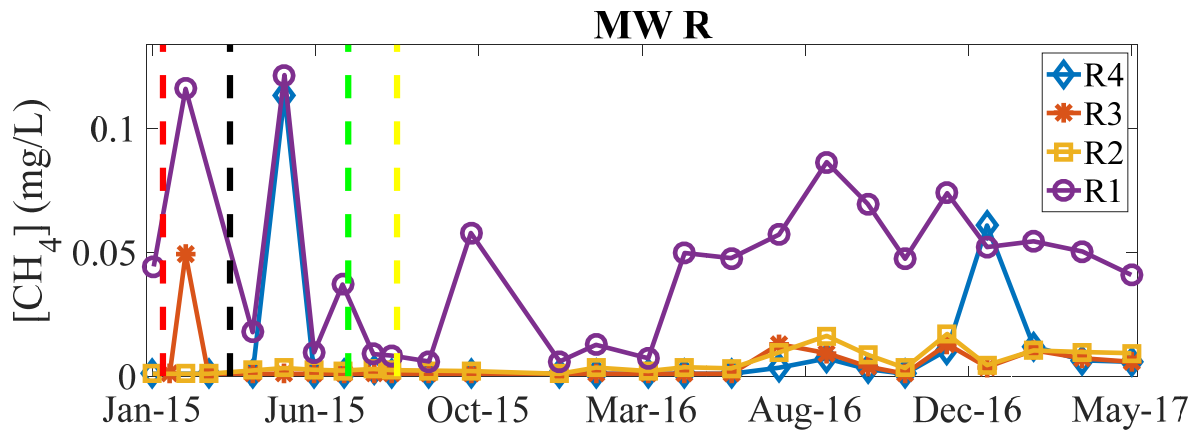

137

138 **Figure S2.** Methane concentrations ( $[CH_4]$ ) at hilltop monitoring well R. Each solid line  
 139 represents  $[CH_4]$  measured in water samples collected from a particular port, numbered from  
 140 deepest (R1) to shallowest (R4). See Table S1 for port elevations. The dashed red, black, and  
 141 green lines respectively designate the times of top-hole drilling, horizontal drilling, and hydraulic  
 142 fracturing of the gas well drilled first on the adjacent well pad, while the dashed yellow line  
 143 designates the start of production (Table S2).

144



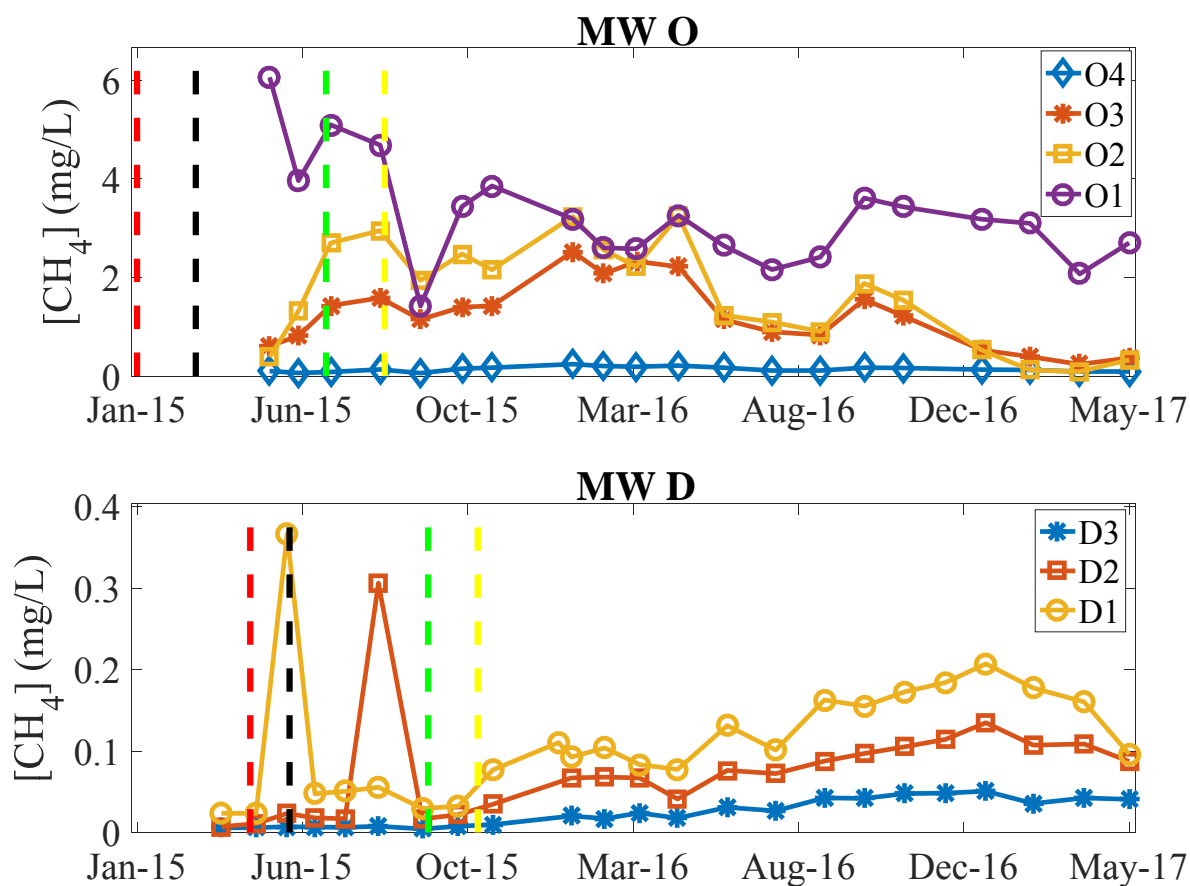

146

147 **Figure S3.** Methane concentrations ( $[CH_4]$ ) at valley monitoring wells O and D. Each solid line  
 148 represents  $[CH_4]$  measured in water samples collected from a particular port, numbered from  
 149 deepest (e.g., O1) to shallowest (e.g., O4). See Table S1 for port elevations. The dashed red,  
 150 black, and green lines respectively designate the times of top-hole drilling, horizontal drilling,  
 151 and hydraulic fracturing of the nearest underlying gas well lateral, while the dashed yellow line  
 152 designates the start of production.

153

154

155

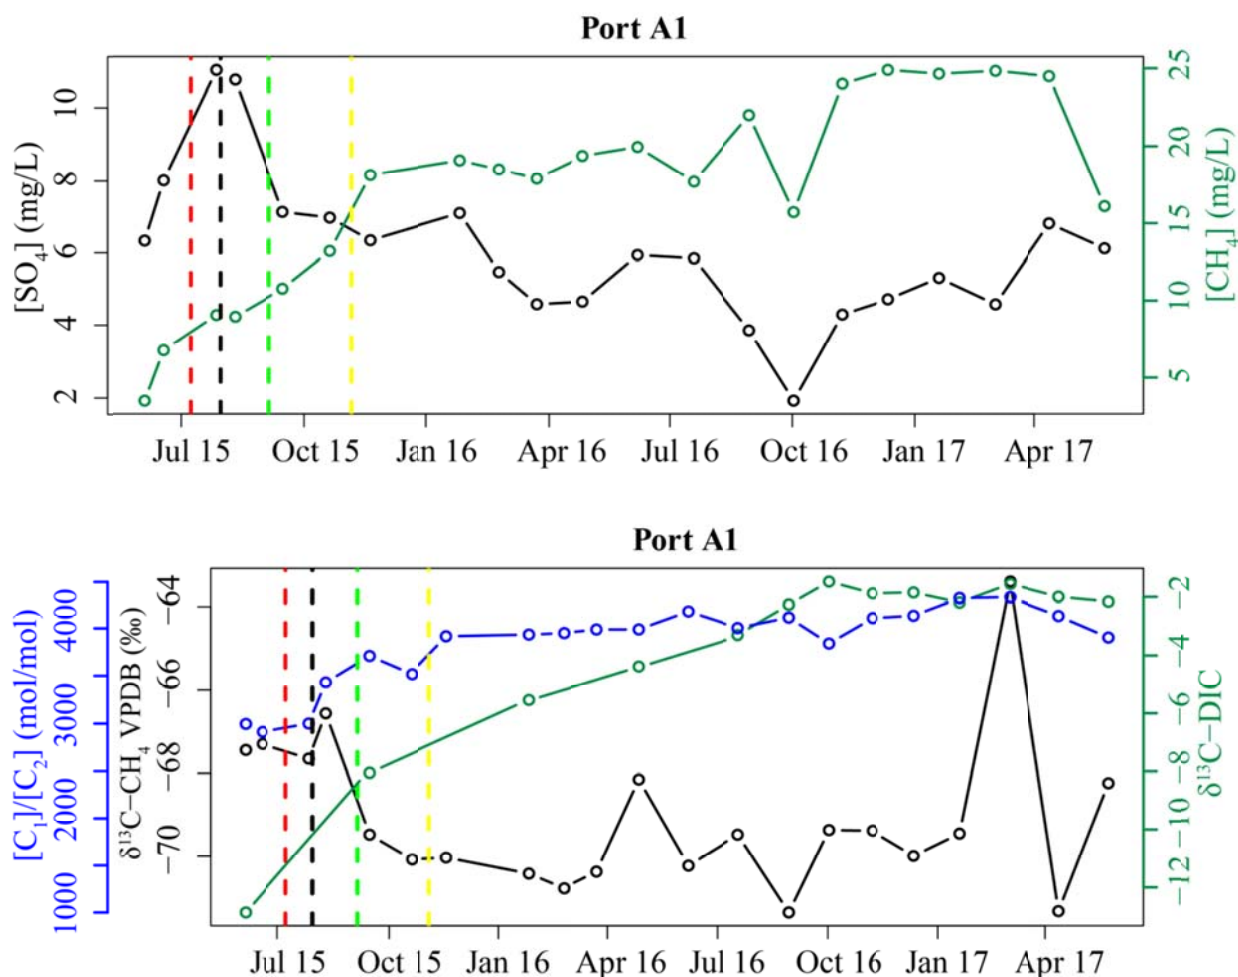

156

157 **Figure S4.** Time series measurements of  $[SO_4]$  and  $[CH_4]$  for the deepest port at MW A (top),  
158 and corresponding measurements of  $\delta^{13}C-CH_4$ ,  $[C_1]/[C_2]$ , and  $\delta^{13}C-DIC$  (bottom). The dashed  
159 red, black, and green lines respectively indicate times of top-hole drilling, horizontal drilling, and  
160 hydraulic fracturing of the nearest underlying gas well lateral, while the dashed yellow line  
161 designates the start of production.

162

163

164

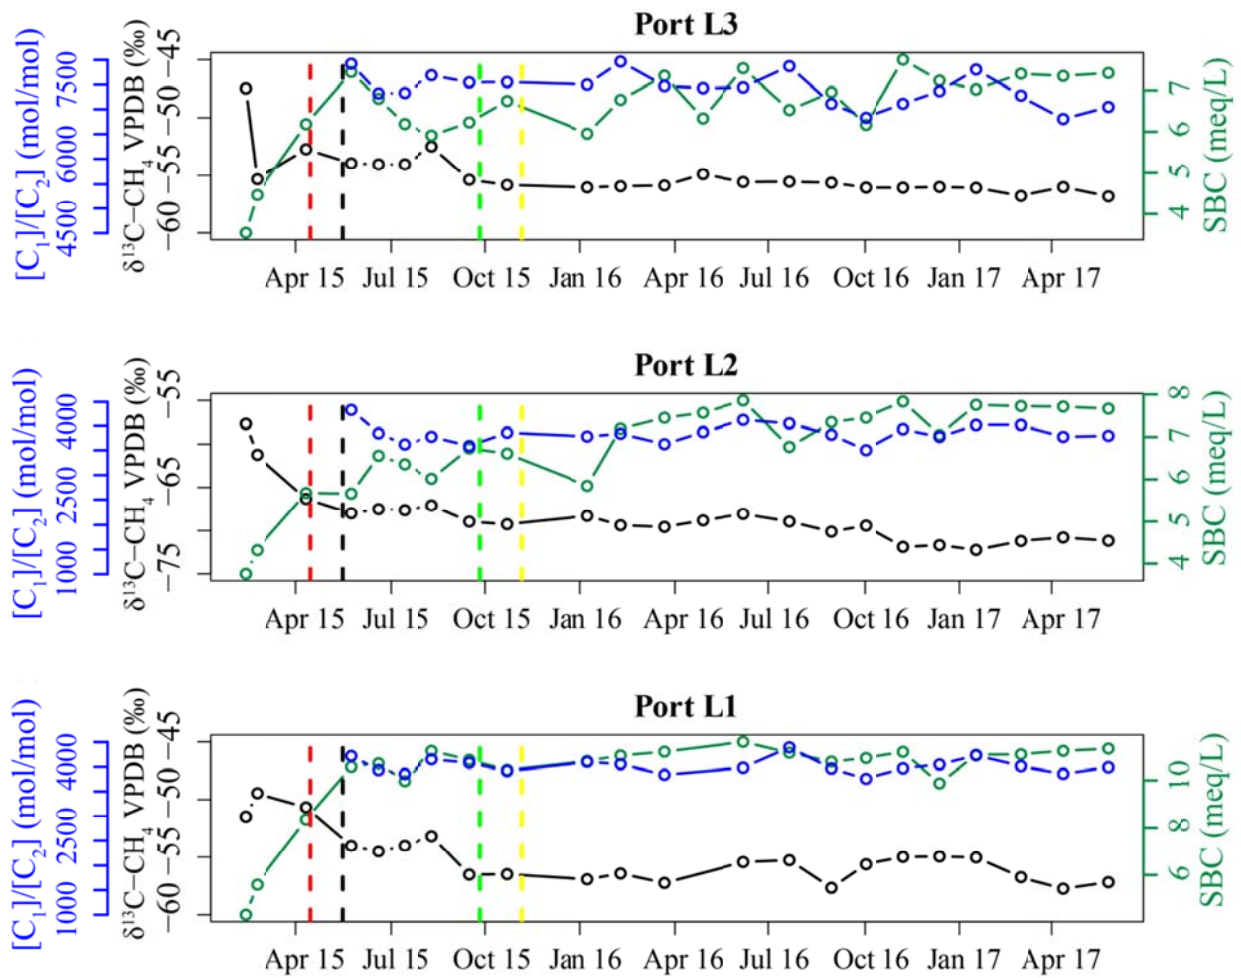

165

166 **Figure S5.** Time-series measurements of  $\delta^{13}C-CH_4$ ,  $[C_1]/[C_2]$ , and salinity (as sum of the base  
167 cations (SBC); Ca, Mg, Na, K) at the three deepest ports in valley well L. The dashed red, black,  
168 and green lines respectively designate the times of top-hole drilling, horizontal drilling, and  
169 hydraulic fracturing of the nearest underlying gas well lateral, while the dashed yellow line  
170 designates the start of production. The sum of base cations constituted  $\geq 99\%$  of positive charge  
171 in groundwater samples.

172

173

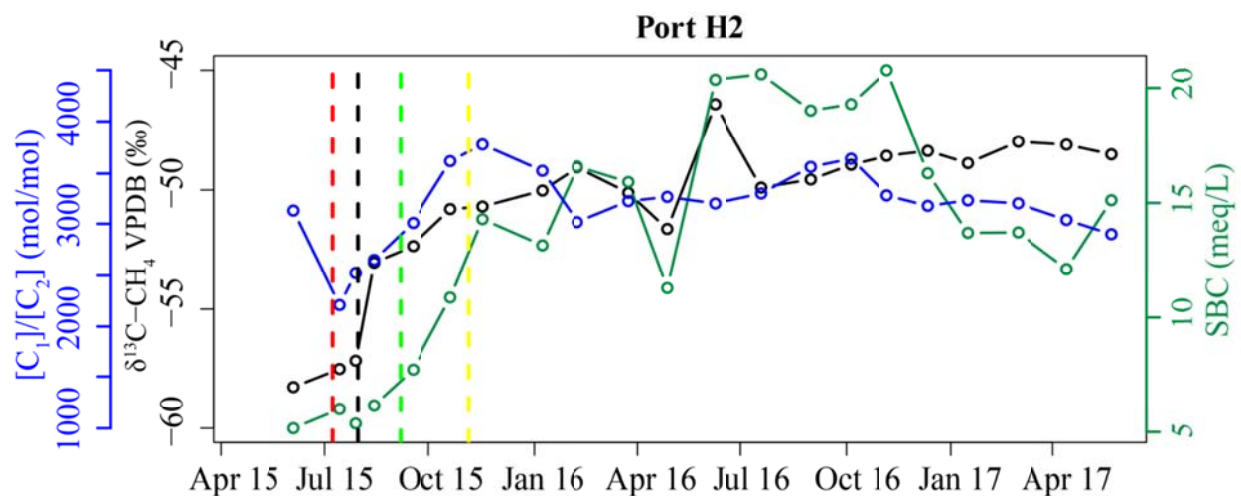

174

175

176 **Figure S6.** Time-series measurements of  $\delta^{13}C-CH_4$ ,  $C_1/C_2$ , and salinity (as sum of the base  
177 cations (SBC); Ca, Mg, Na, K). The dashed red, black, and green lines respectively designate the  
178 times of top-hole drilling, horizontal drilling, and HVHF of the nearest underlying gas well  
179 lateral, while the dashed yellow line designates the start of production (Table S2). The sum of  
180 base cations constituted  $\geq 99\%$  of positive charge in groundwater samples.

181

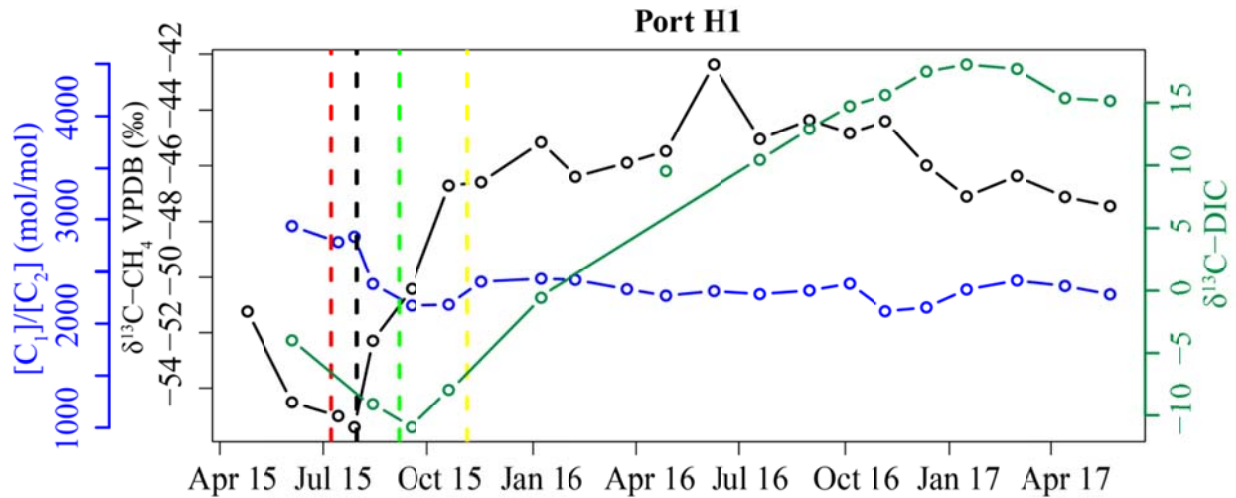

182

183 **Figure S7.** Time-series measurements of  $\delta^{13}\text{C-CH}_4$ ,  $[C_1]/[C_2]$ , and  $\delta^{13}\text{C-DIC}$  for the deepest port  
 184 at MW H. The dashed red, black, and green lines respectively designate the times of top-hole  
 185 drilling, horizontal drilling, and hydraulic fracturing of the nearest underlying gas well lateral,  
 186 while the dashed yellow line designates the start of production.

187

188  
189  
190  
191  
192  
193  
194  
195  
196  
197  
198  
199  
200  
201  
202  
203  
204  
205  
206  
207  
208

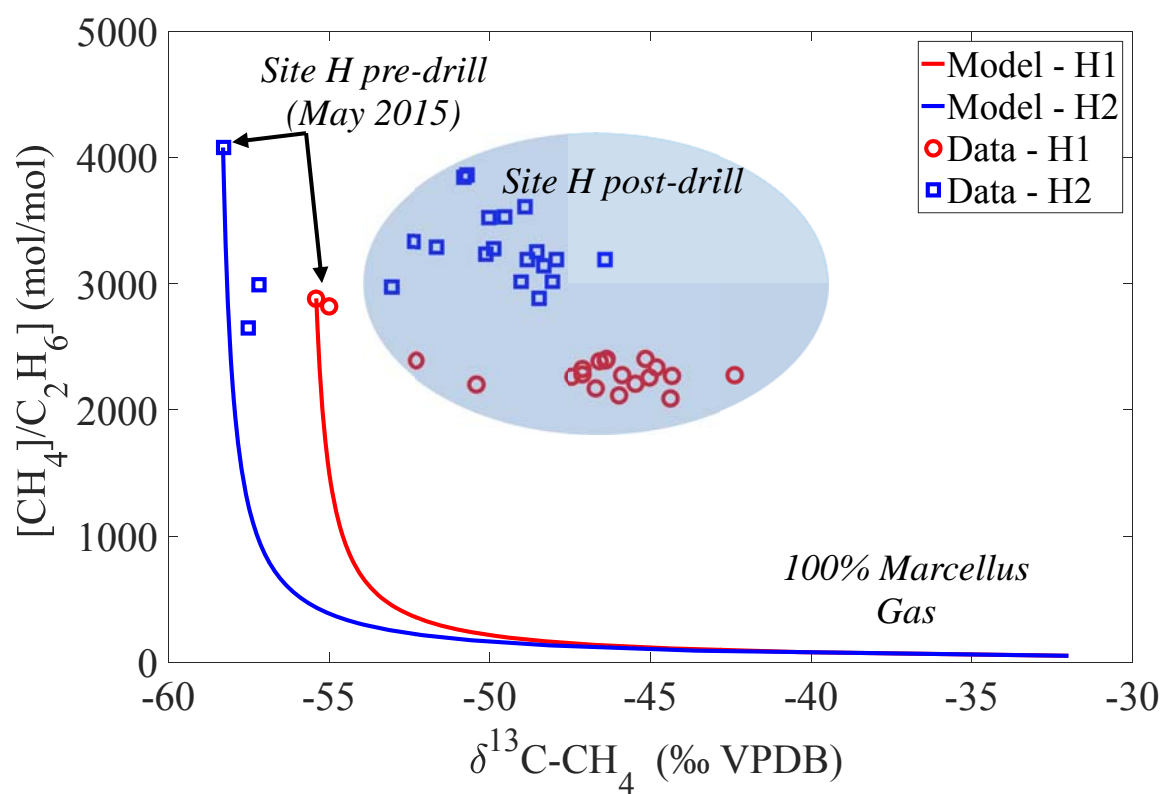

**Figure S8.** Measured methane-to-ethane ratio versus  $\delta^{13}\text{C-CH}_4$  (symbols) and corresponding mixing-model calculations (lines) for port 1 and port 2 at MW H. The end members of the mixing model are baseline (pre-drill) samples from MW H and production gas sampled from the closest gas well. The large deviations between measured and modeled results suggests that increases in  $[\text{CH}_4]$  at MW H are unlikely due to the addition of Marcellus gas.

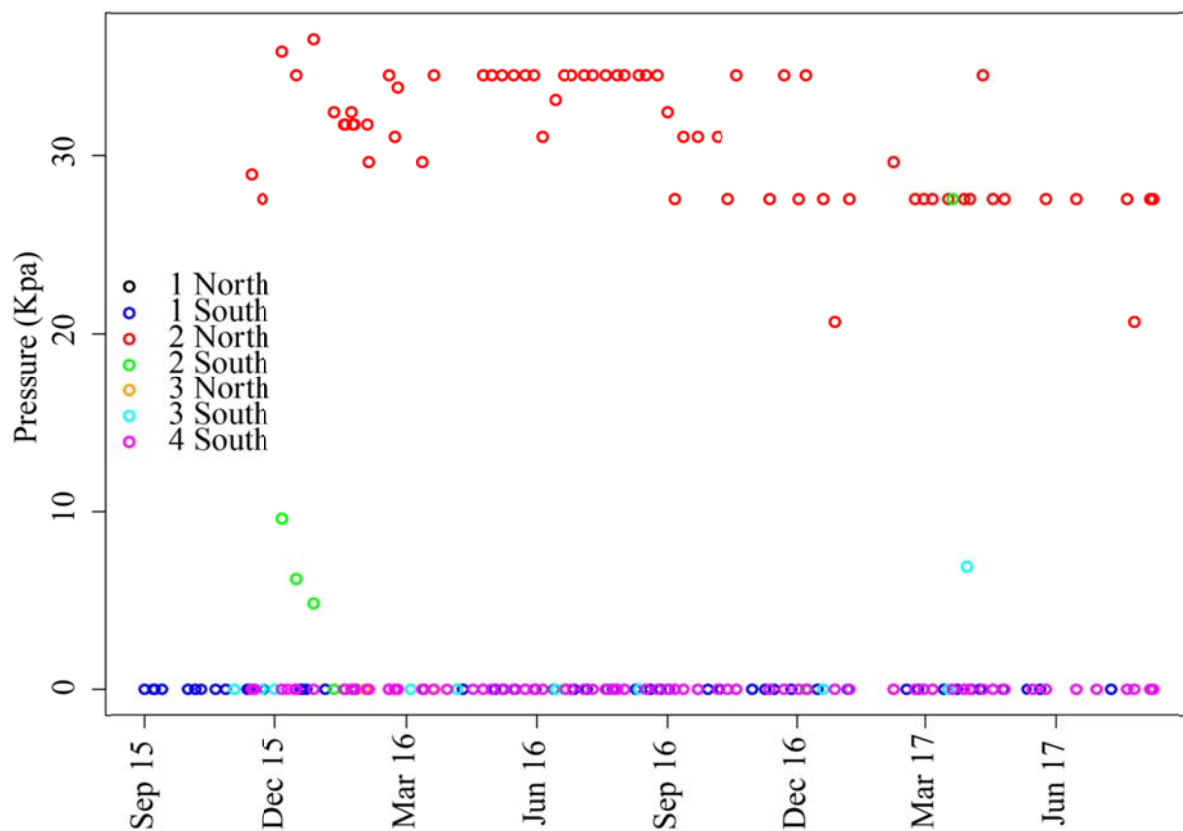

210

211 **Figure S9.** Annular pressures, measured by the operator, at the seven shale gas wells completed  
 212 in the study area. Measurements were not taken at 3 South for two months when the gas well was  
 213 plugged for repair following a casing rupture in which annular pressures temporarily rose to  
 214 9,000 kPa.

215

216

217

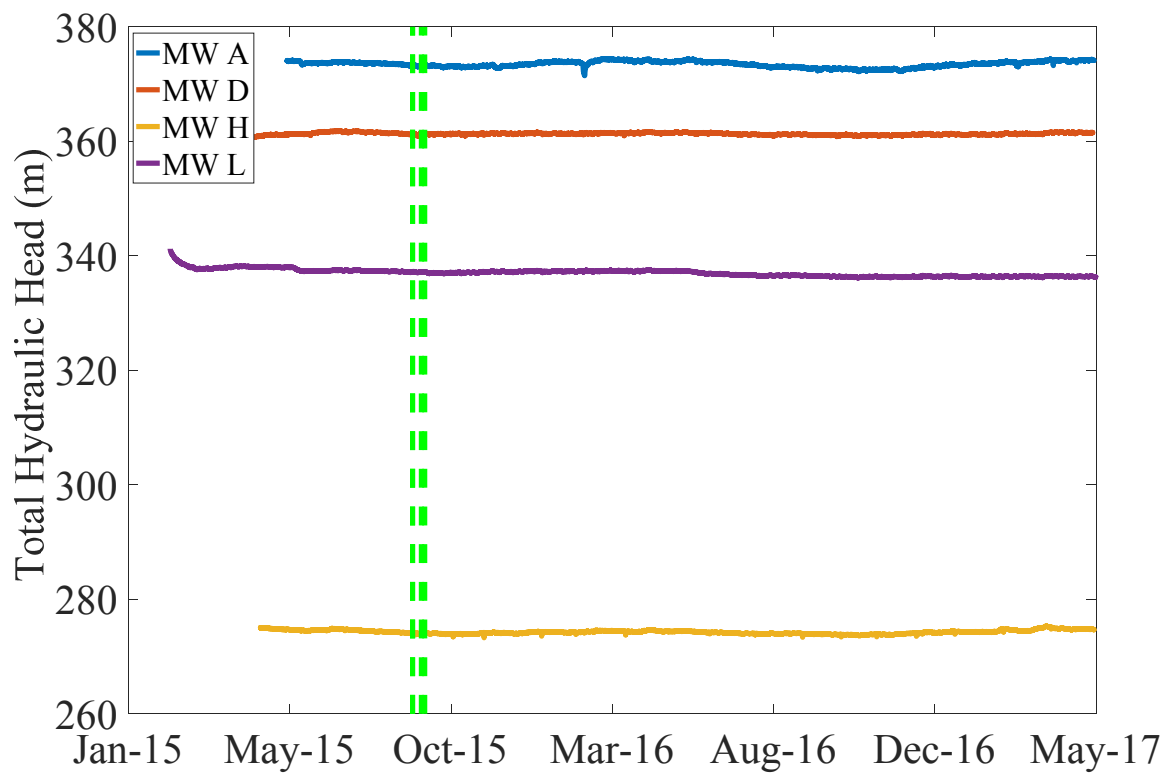

219

220 **Figure S10.** Hydraulic heads measured in the deepest port (port 1) of monitoring wells A, D, H,  
 221 and L. The laterals of the four gas wells that underlie MWs A, D, H, and L were hydraulically  
 222 fractured during the interval bracketed by the dashed green lines. Hydraulic heads within a port  
 223 show little variation, which is indicative of steady groundwater flow.

224



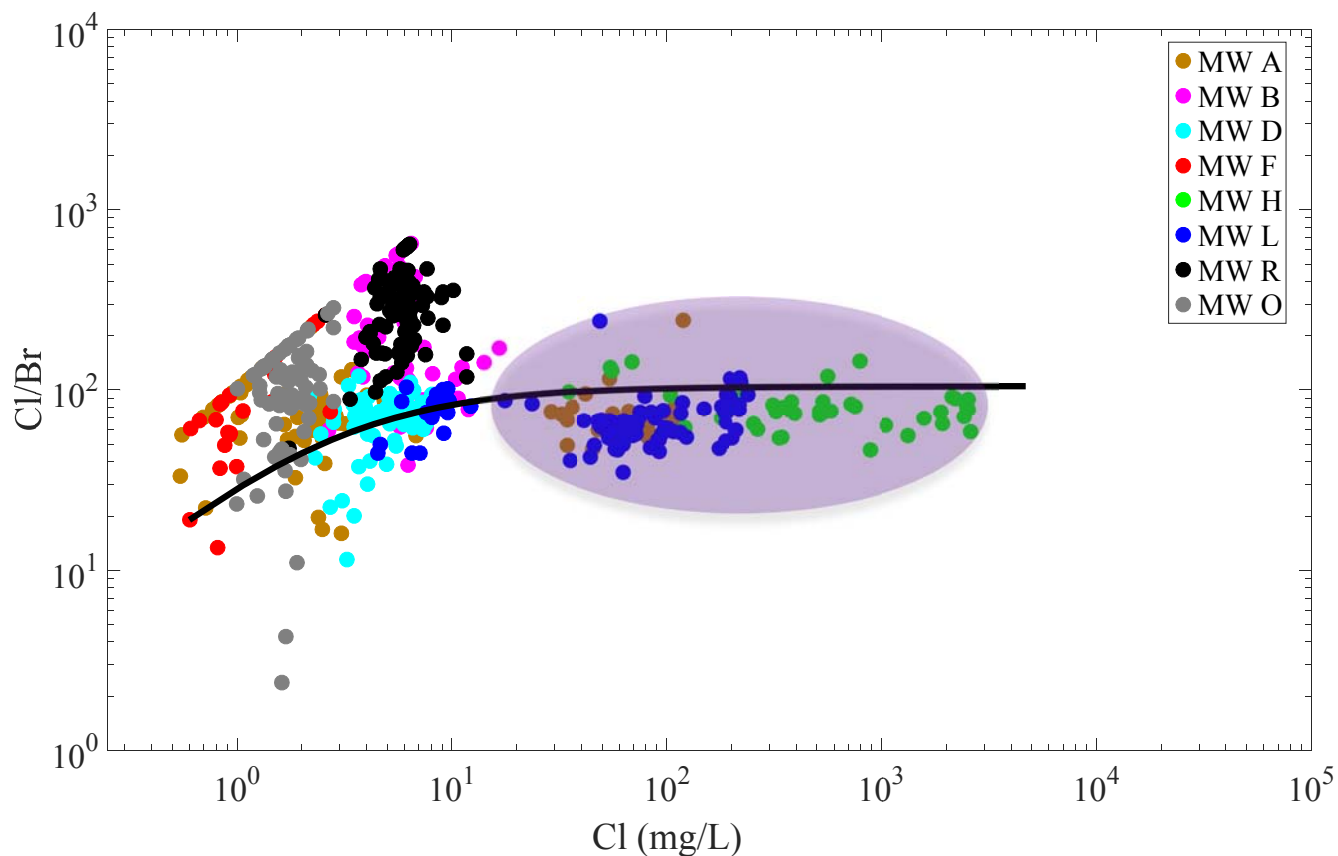

226

227 **Figure S11.** Measured Cl to Br mass ratios (symbols) and a two-end-member mixing curve  
 228 (black line). Valley-well samples from ports A1, H1, H2, and L1-L3, where median  $[\text{CH}_4]$   
 229 exceeded 5 mg/L, are enclosed by the ellipse. These samples fall near the curve computed by  
 230 mixing an Appalachian Basin Brine (ABB) with dilute groundwater from site F, a hilltop site  
 231 located within an aquifer recharge area. Concentrations of Br and Cl for the ABB end member  
 232 were set equal to those of a brine-containing sample from Salt Springs State Park, Susquehanna  
 233 County, PA (19). Samples forming the straight line in the northwest corner of the plot represent  
 234 minimum  $[\text{Cl}]/[\text{Br}]$  because  $[\text{Br}]$  in these samples were below the detection limit (0.01 mg/L).

235

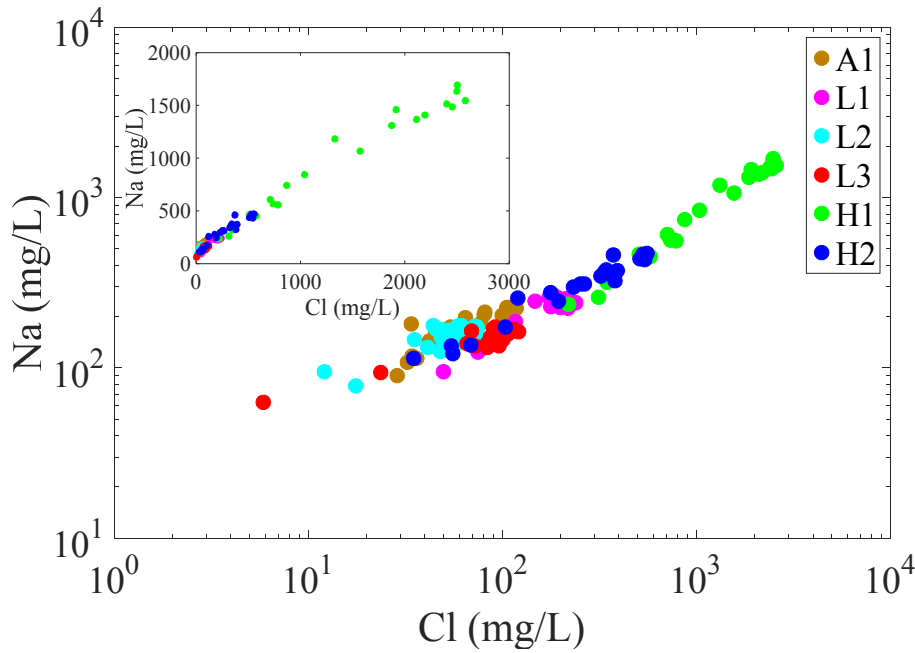

236

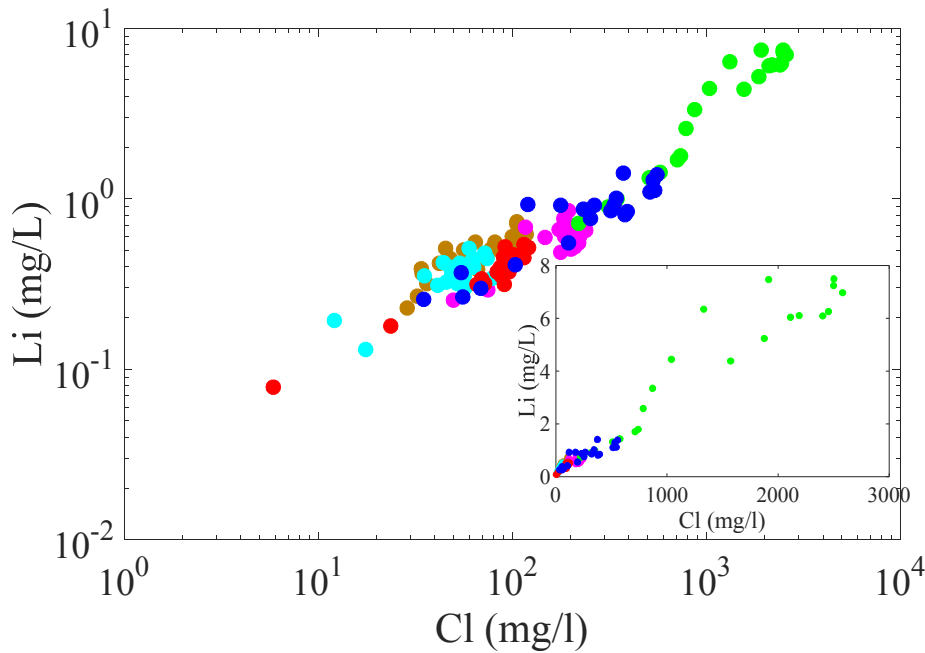

237

238 **Figure S12.** Concentrations of Na and Li versus concentrations of Cl (log-log scale) for valley-  
 239 well samples from ports A1, H1, H2, and L1-L3. Insets show relationships on a linear scale.  
 240 These linear relationships, together with the [Cl]/[Br] as depicted in Figure S11, are consistent  
 241 with conservative mixing associated with dilution of an ABB.

242

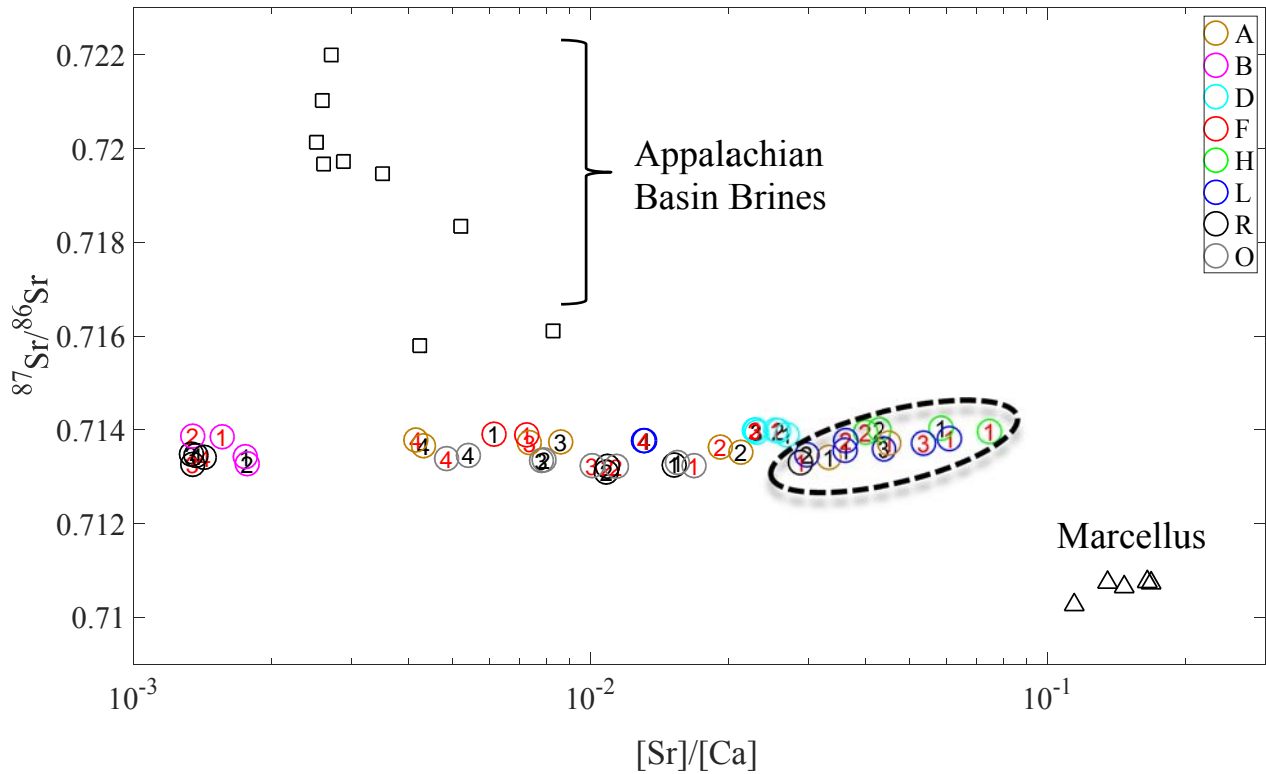

255 **Table S4.** Tabulated results for major anions, major cations, methane, ethane, hydrocarbon isotopes, Li, Sr, and DIC isotopes in 542 groundwater  
 256 samples. Detection limits are 0.002 and 0.0004 mg/L for methane and ethane, respectively.

| Port | Date       | Cl<br>(mg/L) | Br<br>(mg/L) | SO4<br>(mg/L) | Na<br>(mg/L) | Mg<br>(mg/L) | K<br>(mg/L) | Ca<br>(mg/L) | CH4<br>(mg/L) | d13C.CH4 | d2H.CH4 | C2H6<br>(mg/L) | d13C.C2H6 | Li<br>(ug/L) | Sr<br>(ug/L) | Sr87toSr86 | d13C.DIC |
|------|------------|--------------|--------------|---------------|--------------|--------------|-------------|--------------|---------------|----------|---------|----------------|-----------|--------------|--------------|------------|----------|
| A1   | 6/4/2015   | 28.8         | 0.38         | 6.3           | 90.0         | 0.9          | 2.0         | 2.6          | 3.505         | -67.44   | -231.29 | 0.0022         |           | 229.5        | 146.2        |            | -12.86   |
| A1   | 6/18/2015  | 32.4         | 0.44         | 8.0           | 107.7        | 0.4          | 2.3         | 2.2          | 6.771         | -67.30   | -241.18 | 0.0044         |           | 269.6        | 157.7        | 0.713409   |          |
| A1   | 7/27/2015  | 36.4         | 0.45         | 11.0          | 113.8        | 0.3          | 2.2         | 1.4          | 9.063         | -67.65   | -241.15 | 0.0057         |           | 317.2        | 126.8        |            |          |
| A1   | 8/10/2015  | 34.3         | 0.70         | 10.8          | 117.8        | 0.4          | 2.7         | 1.7          | 8.952         | -66.56   | -240.41 | 0.0049         |           | 364.5        | 132.2        |            |          |
| A1   | 9/15/2015  | 42.0         | 0.44         | 7.1           | 144.3        | 0.2          | 1.9         | 2.0          | 10.772        | -69.47   | -240.81 | 0.0054         |           | 419.9        | 235.5        |            | -8.05    |
| A1   | 10/20/2015 | 48.1         | 0.80         | 7.0           | 152.7        | 0.2          | 2.7         | 1.6          | 13.201        | -70.07   | -239.00 | 0.0070         |           | 444.6        | 154.9        |            |          |
| A1   | 11/19/2015 | 54.4         | 0.47         | 6.3           | 174.7        | 0.2          | 5.8         | 1.8          | 18.129        | -70.03   | -239.98 | 0.0087         |           | 324.9        | 177.6        |            |          |
| A1   | 1/26/2016  | 66.4         | 0.87         | 7.1           | 159.8        | 0.1          | 1.6         | 1.8          | 19.079        | -70.41   | -245.36 | 0.0091         |           | 383.5        | 171.9        |            | -5.54    |
| A1   | 2/24/2016  | 56.0         | 0.76         | 5.5           | 156.8        | 0.2          | 1.5         | 1.9          | 18.494        | -70.77   | -248.04 | 0.0088         |           | 502.7        | 191.3        |            |          |
| A1   | 3/23/2016  | 34.1         | 0.50         | 4.6           | 181.9        | 0.2          | 1.5         | 2.1          | 17.895        | -70.37   | -245.91 | 0.0084         |           | 387.6        | 175.2        |            |          |
| A1   | 4/27/2016  | 45.5         | 0.97         | 4.6           | 159.7        | 0.1          | 1.4         | 1.7          | 19.368        | -68.15   | -244.63 | 0.0091         |           | 509.6        | 192.0        |            | -4.38    |
| A1   | 6/7/2016   | 64.7         | 1.14         | 5.9           | 198.0        | 0.3          | 2.4         | 2.2          | 19.949        | -70.23   | -246.40 | 0.0089         | -37.22    | 556.6        | 212.1        | 0.713717   |          |
| A1   | 7/19/2016  | 77.7         | 1.17         | 5.8           | 183.2        | 0.4          | 1.7         | 2.1          | 17.699        | -69.47   | -262.35 | 0.0083         | -36.19    | 507.8        | 200.7        |            | -3.30    |
| A1   | 8/30/2016  | 81.5         | 1.36         | 3.8           | 212.5        | 0.4          | 2.0         | 2.5          | 22.005        | -71.35   | -261.30 | 0.0100         | -36.20    | 559.7        | 244.5        |            | -2.26    |
| A1   | 10/2/2016  | 81.0         | 1.46         | 1.9           | 206.6        | 0.4          | 1.9         | 2.4          | 15.713        | -69.36   | -260.01 | 0.0076         | -35.96    | 505.5        | 235.0        |            | -1.48    |
| A1   | 11/7/2016  | 106.0        | 1.57         | 4.3           | 223.9        | 0.4          | 2.2         | 2.7          | 24.001        | -69.38   | -255.08 | 0.0109         | -36.28    | 731.3        | 293.8        |            | -1.88    |
| A1   | 12/12/2016 | 118.5        | 0.49         | 4.7           | 225.1        | 0.3          | 2.3         | 2.6          | 24.894        | -69.99   | -250.61 | 0.0113         | -36.09    | 617.7        | 292.5        |            | -1.85    |
| A1   | 1/19/2017  | 100.3        | 1.41         | 5.3           | 203.6        | 0.4          | 1.6         | 2.4          | 24.648        | -69.45   | -257.15 | 0.0107         | -36.25    | 599.8        | 297.2        |            | -2.19    |
| A1   | 3/2/2017   | 107.3        | 1.56         | 4.6           | 226.3        | 0.6          | 2.1         | 2.7          | 24.832        | -63.41   | -241.06 | 0.0107         | -36.17    | 639.0        | 274.5        |            | -1.56    |
| A1   | 4/12/2017  | 106.1        | 1.53         | 6.8           | 226.0        | 0.6          | 2.0         | 2.5          | 24.492        | -71.31   | -243.74 | 0.0111         | -38.43    | 712.3        | 288.3        |            | -2.00    |
| A1   | 5/23/2017  | 108.2        | 1.35         | 6.1           | 216.1        | 0.5          | 2.0         | 2.3          | 16.104        | -68.24   | -240.05 | 0.0077         | -36.15    | 545.1        | 220.7        |            | -2.16    |
| A2   | 6/4/2015   | 6.8          | 0.12         | 7.5           | 41.9         | 5.1          | 1.7         | 14.2         | 0.296         | -57.23   | -170.70 | b.d.l.         |           | 97.0         | 507.8        |            |          |
| A2   | 6/18/2015  | 3.0          | 0.05         | 10.0          | 55.8         | 2.5          | 1.4         | 6.8          | 0.449         | -59.47   | -208.86 | b.d.l.         |           | 102.4        | 317.2        | 0.713528   |          |
| A2   | 7/27/2015  | 2.6          | 0.07         | 9.7           | 52.8         | 2.3          | 2.1         | 7.5          | 0.688         | -57.89   | -199.53 | 0.0006         |           | 97.2         | 302.5        |            |          |
| A2   | 8/10/2015  | 3.7          | 0.05         | 10.0          | 51.7         | 3.4          | 1.7         | 10.1         | 0.176         | -59.22   | -205.08 | b.d.l.         |           | 88.2         | 348.5        |            |          |
| A2   | 9/15/2015  | 3.4          | 0.03         | 9.4           | 41.9         | 4.8          | 1.6         | 13.9         | 0.343         | -59.20   | -201.04 | b.d.l.         |           | 58.5         | 367.3        |            |          |
| A2   | 10/20/2015 | 2.6          | 0.03         | 10.5          | 46.3         | 3.8          | 1.7         | 11.3         | 0.453         | -61.39   | -214.42 | b.d.l.         |           | 77.6         | 317.1        |            |          |
| A2   | 11/19/2015 | 1.3          | 0.01         | 7.7           | 44.2         | 3.9          | 2.2         | 11.0         | 0.566         | -60.91   | -215.73 | b.d.l.         |           | 66.4         | 356.8        |            |          |

|    |            |        |      |      |      |     |     |      |       |        |         |        |       |       |          |        |
|----|------------|--------|------|------|------|-----|-----|------|-------|--------|---------|--------|-------|-------|----------|--------|
| A2 | 1/26/2016  | 2.3    | 0.03 | 11.7 | 47.7 | 4.3 | 1.3 | 12.1 | 0.557 | -61.71 | -226.78 | b.d.l. | 62.5  | 361.6 |          |        |
| A2 | 2/24/2016  | 2.2    | 0.03 | 10.8 | 54.0 | 1.8 | 1.5 | 5.8  | 0.702 | -62.20 | -224.97 | 0.0006 | 79.8  | 252.8 |          |        |
| A2 | 3/23/2016  | 1.7    | 0.03 | 6.3  | 52.9 | 2.9 | 1.3 | 8.3  | 0.599 | -62.27 | -225.31 | b.d.l. | 76.5  | 276.6 |          |        |
| A2 | 4/27/2016  | 2.3    | 0.04 | 8.0  | 42.9 | 2.8 | 1.0 | 7.9  | 0.598 | -61.10 | -214.38 | 0.0005 | 89.5  | 311.5 |          |        |
| A2 | 6/7/2016   | 2.3    | 0.03 | 8.9  | 55.7 | 2.5 | 1.8 | 7.3  | 0.676 | -61.43 | -220.37 | 0.0005 | 101.4 | 306.1 | 0.713636 |        |
| A2 | 7/19/2016  | 2.5    | 0.15 | 10.1 | 43.4 | 4.1 | 1.3 | 11.2 | 0.576 | -63.03 | -223.51 | 0.0004 | 75.7  | 346.4 |          | -17.09 |
| A2 | 8/30/2016  | 2.4    | 0.12 | 10.7 | 49.8 | 3.5 | 1.5 | 9.5  | 0.680 | -62.04 | -218.76 | 0.0007 | 92.8  | 342.9 |          | -16.88 |
| A2 | 10/2/2016  | 3.1    | 0.03 | 10.4 | 46.7 | 3.9 | 1.5 | 10.7 | 0.514 | -62.09 | -228.56 | b.d.l. | 76.6  | 329.5 |          | -16.64 |
| A2 | 11/7/2016  | 3.1    | 0.19 | 7.5  | 48.2 | 4.1 | 1.4 | 11.3 | 0.771 | -62.45 | -209.23 | 0.0006 | 92.1  | 364.4 |          | -17.20 |
| A2 | 12/12/2016 | 3.2    | 0.05 | 9.9  | 44.8 | 4.0 | 1.5 | 11.0 | 0.785 | -61.62 | -212.36 | 0.0004 | 93.4  | 397.9 |          | -17.26 |
| A2 | 1/19/2017  | 4.8    | 0.06 | 8.3  | 43.9 | 5.1 | 1.4 | 13.7 | 0.738 | -62.78 | -209.83 | 0.0004 | 84.3  | 434.9 |          | -17.28 |
| A2 | 3/2/2017   | 4.0    | 0.04 | 7.9  | 50.6 | 3.4 | 1.4 | 9.3  | 0.622 | -61.93 | -231.98 | 0.0005 | 89.4  | 277.0 |          | -17.25 |
| A2 | 4/12/2017  | 5.4    | 0.08 | 9.3  | 48.0 | 3.7 | 1.5 | 9.9  | 0.724 | -62.23 | -231.44 | b.d.l. | 100.6 | 386.6 |          | -17.00 |
| A2 | 5/23/2017  | 4.2    | 0.06 | 9.1  | 49.8 | 3.3 | 1.3 | 9.0  | 0.259 | -61.95 | -233.43 | b.d.l. | 98.5  | 321.4 |          | -17.16 |
| A3 | 6/4/2015   | 2.6    | 0.04 | 11.8 | 26.9 | 7.5 | 2.0 | 21.9 | 0.007 |        |         | b.d.l. | 45.6  | 421.1 |          |        |
| A3 | 6/18/2015  | 2.9    | 0.04 | 10.9 | 29.0 | 8.1 | 2.3 | 23.4 | 0.016 | -53.28 | -10.45  | b.d.l. | 43.1  | 440.0 | 0.713737 |        |
| A3 | 7/27/2015  | 2.2    | 0.03 | 10.4 | 25.7 | 8.1 | 1.9 | 23.0 | 0.175 | -49.48 | -151.34 | b.d.l. | 39.5  | 374.1 |          |        |
| A3 | 8/10/2015  | 2.3    | 0.03 | 12.3 | 26.7 | 8.8 | 1.5 | 25.4 | 0.240 | -54.32 | -115.37 | b.d.l. | 32.9  | 364.1 |          |        |
| A3 | 9/15/2015  | 1.7    | 0.02 | 12.5 | 22.8 | 9.0 | 1.5 | 25.0 | 0.009 | -53.63 |         | b.d.l. | 24.3  | 313.2 |          |        |
| A3 | 10/20/2015 | 2.1    | 0.02 | 12.5 | 24.8 | 8.3 | 1.1 | 23.1 | 0.012 | -57.18 | -111.47 | b.d.l. | 29.4  | 332.0 |          |        |
| A3 | 1/26/2016  | 1.9    | 0.03 | 14.8 | 27.2 | 9.1 | 1.4 | 24.2 | 0.019 | -61.18 | -148.38 | b.d.l. | 30.3  | 384.5 |          |        |
| A3 | 2/24/2016  | 1.7    | 0.03 | 16.9 | 23.0 | 7.9 | 0.7 | 22.2 | 0.020 | -61.79 | -153.76 | 0.0004 | 30.8  | 355.3 |          |        |
| A3 | 3/23/2016  | 1.9    | 0.02 | 10.1 | 23.6 | 9.1 | 1.2 | 24.0 | 0.024 | -65.42 | -192.40 | 0.0004 | 30.9  | 326.7 |          |        |
| A3 | 4/27/2016  | 1.9    | 0.03 | 10.2 | 24.5 | 8.9 | 1.3 | 23.2 | 0.025 | -64.66 | -180.03 | 0.0004 | 39.7  | 354.2 |          |        |
| A3 | 6/7/2016   | 2.4    | 0.04 | 10.5 | 25.1 | 9.1 | 1.6 | 24.0 | 0.024 | -63.55 | -169.29 | b.d.l. | 41.9  | 385.5 | 0.713722 |        |
| A3 | 7/19/2016  | b.d.l. | 0.06 | 12.2 | 23.5 | 8.2 | 1.3 | 21.7 | 0.060 | -69.65 | -208.75 | 0.0004 | 39.0  | 365.3 |          | -17.13 |
| A3 | 8/30/2016  | 1.9    | 0.06 | 10.5 | 20.0 | 7.0 | 1.1 | 18.5 | 0.052 | -68.91 | -210.08 | 0.0004 | 41.4  | 354.9 |          | -16.96 |
| A3 | 10/2/2016  | 2.2    | 0.01 | 13.0 | 23.3 | 8.3 | 1.2 | 21.8 | 0.041 | -66.52 | -208.45 | b.d.l. | 35.2  | 340.9 |          | -16.49 |
| A3 | 11/7/2016  | 0.1    | 0.14 | 9.7  | 25.1 | 8.7 | 1.2 | 22.7 | 0.040 | -69.49 | -218.04 | 0.0004 | 41.8  | 342.1 |          | -17.18 |
| A3 | 12/12/2016 | 2.1    | 0.04 | 12.9 | 19.4 | 7.9 | 1.2 | 20.3 | 0.053 | -54.90 | -218.76 | 0.0004 | 37.9  | 364.6 |          | -17.17 |
| A3 | 1/19/2017  | 2.4    | 0.03 | 11.1 | 21.3 | 8.0 | 1.0 | 20.7 | 0.053 | -70.19 | -216.71 | 0.0004 | 39.2  | 394.8 |          | -17.25 |
| A3 | 3/2/2017   | 2.6    | 0.03 | 11.6 | 24.1 | 8.8 | 1.1 | 22.6 | 0.037 | -66.39 | -216.57 | 0.0004 | 40.6  | 332.4 |          | -17.19 |
| A3 | 4/12/2017  | 2.6    | 0.04 | 12.1 | 23.1 | 8.4 | 1.2 | 21.9 | 0.047 | -67.23 | -221.80 | 0.0004 | 42.5  | 418.0 |          | -16.91 |
| A3 | 5/23/2017  | 2.5    | 0.05 | 12.2 | 24.3 | 8.4 | 1.2 | 21.4 | 0.036 | -65.28 | -195.71 | b.d.l. | 39.1  | 338.6 |          | -17.05 |

|    |            |        |        |      |      |      |        |      |        |        |         |        |      |       |          |
|----|------------|--------|--------|------|------|------|--------|------|--------|--------|---------|--------|------|-------|----------|
| A4 | 6/4/2015   | 1.1    | 0.01   | 13.0 | 18.5 | 10.3 | 1.3    | 27.9 | 0.002  |        |         | b.d.l. | 14.5 | 269.9 |          |
| A4 | 6/18/2015  | 0.8    | b.d.l. | 12.9 | 20.4 | 10.7 | 1.6    | 30.5 | 0.004  |        |         | b.d.l. | 14.1 | 287.5 | 0.713664 |
| A4 | 7/27/2015  | 1.0    | 0.01   | 13.1 | 19.4 | 9.9  | 1.4    | 29.0 | 0.007  |        |         | b.d.l. | 13.2 | 271.2 |          |
| A4 | 8/10/2015  | 1.0    | 0.02   | 13.2 | 20.0 | 9.1  | 1.4    | 25.8 | 0.003  |        |         | b.d.l. | 13.2 | 275.8 |          |
| A4 | 9/15/2015  | 0.9    | b.d.l. | 13.1 | 18.5 | 10.6 | 1.1    | 29.5 | 0.003  | -62.32 | -209.45 | b.d.l. | 10.6 | 256.9 |          |
| A4 | 10/20/2015 | 1.0    | b.d.l. | 13.2 | 20.3 | 10.4 | b.d.l. | 29.7 | 0.003  | -61.24 | -235.58 | b.d.l. | 13.0 | 254.2 |          |
| A4 | 1/26/2016  | 0.6    | 0.01   | 13.6 | 20.7 | 11.5 | 1.0    | 31.1 | 0.006  | -59.92 | -231.83 | b.d.l. | 12.8 | 264.2 |          |
| A4 | 2/24/2016  | 0.5    | 0.02   | 18.6 | 20.1 | 10.8 | 1.1    | 29.2 | 0.006  | -66.37 | -240.82 | 0.0004 | 12.8 | 262.2 |          |
| A4 | 3/23/2016  | 0.9    | 0.01   | 10.1 | 17.5 | 11.2 | 0.9    | 30.0 | 0.008  | -67.09 | -242.01 | 0.0004 | 12.6 | 247.7 |          |
| A4 | 4/27/2016  | 0.8    | b.d.l. | 9.8  | 17.3 | 11.2 | 1.0    | 29.3 | 0.009  | -68.00 | -245.46 | 0.0004 | 14.9 | 260.0 |          |
| A4 | 6/7/2016   | 0.7    | 0.01   | 11.1 | 16.7 | 11.5 | 1.4    | 30.5 | 0.009  | -67.24 | -246.54 | 0.0004 | 15.1 | 276.9 | 0.713778 |
| A4 | 7/19/2016  | b.d.l. | 0.04   | 12.9 | 16.7 | 10.4 | 1.0    | 27.2 | 0.010  |        |         | 0.0004 | 12.3 | 256.4 | -16.55   |
| A4 | 8/30/2016  | 0.7    | 0.03   | 12.3 | 12.9 | 7.5  | 1.0    | 20.9 | 0.015  | -69.10 | -250.82 | 0.0004 | 14.3 | 260.4 | -16.17   |
| A4 | 10/2/2016  | 1.0    | b.d.l. | 13.9 | 15.9 | 10.6 | 1.0    | 27.6 | 0.017  | -68.51 | -255.29 | b.d.l. | 14.5 | 239.0 | -15.92   |
| A4 | 11/7/2016  | 0.1    | 0.03   | 10.0 | 17.1 | 11.0 | 0.9    | 28.6 | 0.019  | -69.35 | -249.65 | 0.0004 | 18.9 | 290.8 | -16.63   |
| A4 | 12/12/2016 | 0.8    | b.d.l. | 14.7 | 14.6 | 10.2 | 1.0    | 26.8 | 0.019  | -40.44 | -248.84 | 0.0004 | 15.7 | 257.2 | -16.49   |
| A4 | 1/19/2017  | 1.2    | b.d.l. | 11.7 | 17.1 | 10.9 | 1.1    | 28.1 | 0.022  | -70.36 | -247.07 | 0.0004 | 16.2 | 282.8 | -16.68   |
| A4 | 3/2/2017   | 1.1    | 0.01   | 11.1 | 17.1 | 10.7 | 1.0    | 28.0 | 0.018  | -69.28 | -239.77 | 0.0004 | 13.7 | 208.0 | -16.68   |
| A4 | 4/12/2017  | 1.0    | 0.01   | 13.0 | 16.1 | 10.3 | 1.1    | 27.1 | 0.017  | -69.52 | -239.03 | b.d.l. | 16.6 | 288.8 | -16.33   |
| A4 | 5/23/2017  | 1.0    | 0.01   | 12.9 | 16.5 | 10.5 | 1.0    | 27.0 | 0.018  | -69.31 | -243.93 | b.d.l. | 16.0 | 251.7 | -16.54   |
| B1 | 3/28/2015  | 4.6    | 0.02   | 18.2 | 5.7  | 9.8  | 1.9    | 30.3 | 0.005  |        |         |        | 10.9 | 110.8 |          |
| B1 | 4/12/2015  | 3.8    | b.d.l. | 16.5 | 2.9  | 9.4  | 1.6    | 25.5 | 0.002  |        |         |        | 9.2  | 90.2  |          |
| B1 | 5/11/2015  | 5.7    | 0.01   | 15.7 | 3.4  | 9.7  | 1.0    | 27.6 | 0.010  | -44.27 | -175.08 | b.d.l. | 7.7  | 83.5  |          |
| B1 | 6/5/2015   | 4.9    | b.d.l. | 15.2 | 1.3  | 9.8  | 1.2    | 26.2 | 0.061  | -55.96 | -256.03 | b.d.l. | 7.3  | 91.1  |          |
| B1 | 6/18/2015  | 3.9    | 0.01   | 15.3 | 1.3  | 10.1 | 1.4    | 27.1 | 0.003  |        |         | b.d.l. | 7.6  | 104.3 | 0.713429 |
| B1 | 7/13/2015  | 6.2    | 0.03   | 15.4 | 4.5  | 9.6  | 1.5    | 28.0 | 0.002  |        |         | b.d.l. | 7.2  | 86.8  |          |
| B1 | 8/12/2015  | 6.8    | 0.02   | 15.8 | 4.7  | 9.2  | 1.4    | 27.0 | 0.002  |        |         | b.d.l. | 6.3  | 89.2  |          |
| B1 | 9/17/2015  | 5.7    | 0.01   | 15.1 | 2.7  | 10.3 | 1.7    | 30.2 | 0.002  |        |         | b.d.l. | 7.1  | 92.9  |          |
| B1 | 10/21/2015 | 5.5    | 0.01   | 16.7 | 4.8  | 9.9  | 0.2    | 29.9 | 0.002  | -32.20 |         | b.d.l. | 7.7  | 93.1  |          |
| B1 | 1/7/2016   | 3.7    | 0.02   | 15.4 | 5.3  | 9.6  | 1.2    | 26.4 | 0.003  | -35.00 | -407.70 | b.d.l. | 5.8  | 102.2 |          |
| B1 | 1/14/2016  | 4.0    | 0.02   | 22.4 | 6.7  | 9.5  | 1.7    | 26.5 | 0.005  | -62.98 | -321.11 | b.d.l. | 4.8  | 101.1 |          |
| B1 | 1/26/2016  | 3.7    | 0.03   | 21.5 | 5.0  | 10.8 | 1.2    | 30.5 | 0.002  | -48.49 | -350.69 | b.d.l. | 6.9  | 97.8  |          |
| B1 | 2/9/2016   | 3.5    | 0.02   | 27.3 | 4.8  | 10.4 | 1.5    | 29.1 | b.d.l. | -36.47 |         | 0.0004 | 6.1  | 90.5  |          |
| B1 | 3/24/2016  | 3.8    | 0.02   | 9.6  | 1.1  | 10.3 | 1.1    | 28.1 | 0.002  | -47.03 | -197.02 | 0.0004 | 7.5  | 90.8  |          |

|    |            |      |        |      |        |      |        |      |        |        |         |        |      |       |          |        |
|----|------------|------|--------|------|--------|------|--------|------|--------|--------|---------|--------|------|-------|----------|--------|
| B1 | 4/29/2016  | 6.2  | 0.04   | 11.0 | 0.7    | 10.4 | 1.2    | 28.6 | 0.002  | -56.95 | -274.00 | 0.0004 | 7.0  | 94.9  |          |        |
| B1 | 6/8/2016   | 7.4  | 0.04   | 13.9 | 0.6    | 10.3 | 1.2    | 28.1 | 0.009  | -45.66 | -252.81 | 0.0004 | 8.5  | 96.0  | 0.713846 |        |
| B1 | 7/20/2016  | 7.6  | 0.12   | 16.7 | 1.1    | 10.7 | 1.3    | 30.4 | 0.022  | -42.95 | -337.44 | 0.0004 | 8.9  | 94.3  |          | -18.22 |
| B1 | 8/31/2016  | 8.1  | 0.07   | 26.1 | 0.9    | 10.2 | 1.3    | 28.3 | 0.107  | -20.24 | -52.54  | 0.0009 | 6.9  | 94.3  |          | -18.30 |
| B1 | 10/5/2016  | 2.7  | 0.04   | 17.6 | 0.8    | 10.9 | 1.0    | 30.3 | 0.022  | -28.37 | -197.32 | 0.0004 | 7.3  | 93.4  |          | -11.61 |
| B1 | 11/8/2016  | 6.2  | 0.16   | 21.1 | 1.8    | 11.2 | 1.3    | 30.5 | 0.028  | -32.12 | -164.75 | 0.0004 | 10.1 | 102.3 |          | -18.14 |
| B1 | 12/14/2016 | 10.7 | 0.12   | 17.9 | b.d.l. | 9.8  | 1.4    | 26.9 | 0.011  | -43.55 | -302.47 | 0.0004 | 10.5 | 96.0  |          | -17.85 |
| B1 | 1/18/2017  | 5.7  | 0.07   | 11.4 | 0.8    | 10.6 | 1.1    | 27.9 | 0.008  |        |         | 0.0004 | 9.8  | 101.0 |          | -18.37 |
| B1 | 2/28/2017  | 5.9  | 0.05   | 14.5 | 0.5    | 9.8  | 1.0    | 26.5 | 0.005  |        |         | 0.0004 | 7.9  | 86.6  |          | -18.52 |
| B1 | 4/13/2017  | 6.1  | 0.07   | 17.3 | 1.5    | 9.9  | 1.2    | 27.0 | 0.006  |        |         | 0.0004 | 9.9  | 101.5 |          | -18.81 |
| B1 | 5/23/2017  | 5.4  | 0.04   | 17.1 | 1.3    | 10.0 | 1.2    | 26.5 | 0.009  |        |         | b.d.l. | 8.6  | 78.5  |          | -18.37 |
| B2 | 3/31/2015  | 4.0  | 0.01   | 18.6 | 6.2    | 10.4 | 1.8    | 30.4 |        |        |         |        | 1.5  | 81.0  |          |        |
| B2 | 4/12/2015  | 5.5  | b.d.l. | 15.2 | 2.1    | 7.3  | 1.2    | 20.4 |        |        |         |        | 6.2  | 61.4  |          |        |
| B2 | 5/11/2015  | 6.5  | 0.01   | 14.7 | 2.6    | 7.2  | 0.8    | 20.6 |        |        |         |        | 5.3  | 58.5  |          |        |
| B2 | 6/5/2015   | 5.5  | 0.01   | 14.3 | 1.4    | 7.2  | 1.3    | 20.2 |        |        |         |        | 6.5  | 81.1  |          |        |
| B2 | 6/18/2015  | 6.0  | 0.03   | 14.6 | 1.3    | 7.5  | 1.3    | 20.7 | 0.002  |        |         | b.d.l. | 5.4  | 80.4  | 0.713278 |        |
| B2 | 7/13/2015  | 6.7  | 0.02   | 14.3 | 1.0    | 7.1  | 0.9    | 19.8 | b.d.l. |        |         | b.d.l. | 5.6  | 62.2  |          |        |
| B2 | 8/12/2015  | 6.8  | 0.02   | 16.0 | 0.7    | 7.6  | 1.1    | 20.7 | b.d.l. |        |         | b.d.l. | 5.2  | 61.4  |          |        |
| B2 | 9/17/2015  | 5.7  | 0.01   | 18.7 | 1.8    | 8.7  | 1.1    | 23.9 | b.d.l. |        |         | b.d.l. | 8.0  | 83.6  |          |        |
| B2 | 10/21/2015 | 5.4  | 0.02   | 17.9 | 4.2    | 8.3  | b.d.l. | 23.9 | b.d.l. | -49.49 | -223.83 | b.d.l. | 5.4  | 67.1  |          |        |
| B2 | 1/7/2016   | 3.9  | 0.03   | 21.3 | 4.6    | 7.4  | 0.7    | 20.3 | 0.002  | -39.71 | -194.29 | b.d.l. | 4.7  | 66.0  |          |        |
| B2 | 1/14/2016  | 4.0  | 0.02   | 24.3 | 5.7    | 7.9  | 1.4    | 21.4 | 0.003  | -33.82 | -185.32 | b.d.l. | 4.0  | 71.1  |          |        |
| B2 | 1/26/2016  | 3.5  | 0.01   | 22.3 | 0.8    | 7.7  | 0.9    | 21.4 | 0.017  | -24.87 | -69.18  | b.d.l. | 5.9  | 67.4  |          |        |
| B2 | 2/9/2016   | 4.0  | 0.02   | 28.2 | 3.1    | 8.2  | 1.0    | 23.2 | b.d.l. | -20.92 | -34.70  | 0.0004 | 5.4  | 65.3  |          |        |
| B2 | 3/24/2016  | 10.4 | 0.09   | 10.2 | 1.4    | 9.0  | 0.9    | 23.8 | 0.002  | -53.23 | -214.64 | 0.0004 | 5.4  | 69.4  |          |        |
| B2 | 4/29/2016  | 11.1 | 0.08   | 9.4  | 1.3    | 9.5  | 0.9    | 25.0 | 0.002  | -62.05 | -228.85 | 0.0004 | 6.0  | 72.6  |          |        |
| B2 | 6/8/2016   | 16.7 | 0.10   | 13.1 | 0.2    | 9.6  | 1.4    | 26.6 | 0.004  | -50.24 | -208.70 | 0.0004 | 2.5  | 78.4  | 0.713870 |        |
| B2 | 7/20/2016  | 14.1 | 0.10   | 17.8 | 1.7    | 9.2  | 1.1    | 25.1 | 0.015  | -15.07 | -10.06  | 0.0004 | 8.3  | 76.4  |          | -18.84 |
| B2 | 8/31/2016  | 8.3  | 0.10   | 17.8 | 1.3    | 8.6  | 1.2    | 23.8 | 0.006  |        |         | 0.0004 | 6.9  | 68.1  |          | -18.55 |
| B2 | 10/5/2016  | 9.7  | 0.11   | 19.4 | 1.0    | 9.1  | 0.9    | 24.8 | 0.002  |        |         | 0.0004 | 6.1  | 71.9  |          | -18.56 |
| B2 | 11/8/2016  | 5.7  | 0.09   | 14.0 | 1.0    | 9.3  | 0.9    | 24.6 | 0.005  |        |         | 0.0004 | 9.5  | 80.5  |          | -18.34 |
| B2 | 12/14/2016 | 11.9 | 0.15   | 17.4 | b.d.l. | 7.7  | 1.0    | 21.3 | 0.005  |        |         | 0.0004 | 8.3  | 66.9  |          | -18.47 |
| B2 | 1/18/2017  | 7.3  | 0.08   | 13.6 | 1.3    | 7.8  | 1.0    | 21.3 | 0.005  |        |         | 0.0004 | 7.8  | 68.3  |          | -19.12 |
| B2 | 2/28/2017  | 6.2  | 0.05   | 13.8 | 0.7    | 8.0  | 0.8    | 20.9 | 0.004  |        |         | 0.0004 | 8.3  | 58.8  |          | -19.36 |

|    |            |     |      |      |       |     |     |      |       |        |         |        |       |       |          |        |
|----|------------|-----|------|------|-------|-----|-----|------|-------|--------|---------|--------|-------|-------|----------|--------|
| B2 | 4/13/2017  | 6.1 | 0.05 | 16.8 | 1.0   | 7.4 | 1.0 | 20.1 | 0.005 |        |         | b.d.l. | 7.2   | 67.8  |          | -19.34 |
| B2 | 5/23/2017  | 5.7 | 0.05 | 16.7 | 0.7   | 7.8 | 0.8 | 20.4 | 0.007 |        |         | b.d.l. | 6.4   | 57.7  |          | -19.02 |
| D1 | 3/28/2015  | 4.6 | 0.06 | 15.1 | 88.3  | 3.2 | 2.1 | 10.1 | 0.024 | -61.06 | -59.65  |        | 190.4 | 522.4 |          |        |
| D1 | 4/27/2015  | 5.6 | 0.06 | 13.0 | 96.8  | 2.2 | 2.5 | 6.8  | 0.024 | -61.26 | -85.65  |        | 240.4 | 400.7 |          |        |
| D1 | 5/24/2015  | 6.1 | 0.07 | 11.8 | 109.1 | 2.1 | 2.6 | 6.7  | 0.367 | -65.68 | -161.88 | b.d.l. | 215.6 | 399.1 |          |        |
| D1 | 6/17/2015  | 5.0 | 0.13 | 12.9 | 101.1 | 2.1 | 2.3 | 7.3  | 0.048 | -67.66 | -150.16 | b.d.l. | 229.0 | 427.1 | 0.713896 |        |
| D1 | 7/13/2015  | 6.5 | 0.07 | 12.5 | 98.4  | 1.8 | 2.1 | 6.6  | 0.051 | -67.42 | -157.73 | b.d.l. | 230.4 | 375.4 |          |        |
| D1 | 8/11/2015  | 7.3 | 0.09 | 12.6 | 98.6  | 2.1 | 2.7 | 6.7  | 0.056 | -66.06 | -151.22 | b.d.l. | 205.7 | 383.7 |          |        |
| D1 | 9/18/2015  | 6.1 | 0.07 | 10.2 | 95.1  | 2.0 | 2.0 | 7.2  | 0.030 | -67.11 | -148.43 | b.d.l. | 171.2 | 380.5 |          |        |
| D1 | 10/19/2015 | 5.9 | 0.09 | 13.6 | 92.0  | 2.1 | 1.0 | 7.2  | 0.032 | -67.05 | -143.18 | b.d.l. | 147.0 | 418.1 |          |        |
| D1 | 11/18/2015 | 6.4 | 0.06 | 18.0 | 95.7  | 2.3 | 2.1 | 7.6  | 0.077 | -68.32 | -185.70 | b.d.l. | 173.2 | 435.6 |          |        |
| D1 | 1/14/2016  | 6.6 | 0.08 | 12.9 | 101.4 | 2.4 | 1.9 | 7.7  | 0.110 | -70.56 | -232.03 | b.d.l. | 161.2 | 409.3 |          |        |
| D1 | 1/25/2016  | 6.6 | 0.07 | 12.7 | 107.8 | 2.5 | 2.1 | 7.9  | 0.093 | -69.62 | -214.92 | b.d.l. | 169.2 | 404.8 |          |        |
| D1 | 2/23/2016  | 4.4 | 0.06 | 12.4 | 100.3 | 2.2 | 1.8 | 7.3  | 0.104 | -70.20 | -235.82 | 0.0004 | 160.1 | 383.2 |          |        |
| D1 | 3/24/2016  | 4.4 | 0.06 | 8.4  | 105.7 | 2.4 | 1.4 | 7.8  | 0.083 | -69.06 | -246.51 | 0.0004 | 153.9 | 382.7 |          |        |
| D1 | 4/26/2016  | 4.9 | 0.07 | 9.0  | 105.8 | 2.5 | 1.5 | 7.7  | 0.078 | -68.39 | -247.14 | 0.0004 | 202.8 | 404.2 |          |        |
| D1 | 6/8/2016   | 6.8 | 0.09 | 10.8 | 108.3 | 2.3 | 2.0 | 7.7  | 0.131 | -67.15 | -249.79 | 0.0004 | 210.5 | 428.2 | 0.713986 |        |
| D1 | 7/20/2016  | 7.3 | 0.09 | 12.2 | 99.3  | 2.3 | 1.5 | 7.0  | 0.101 | -64.95 | -252.14 | 0.0004 | 212.0 | 394.1 |          | -16.59 |
| D1 | 8/31/2016  | 4.1 | 0.10 | 9.5  | 101.2 | 2.1 | 1.7 | 6.8  | 0.163 | -64.57 | -266.96 | 0.0004 | 201.2 | 365.6 |          | -16.64 |
| D1 | 10/5/2016  | 2.3 | 0.05 | 13.1 | 106.2 | 2.1 | 1.3 | 6.6  | 0.155 | -65.25 | -259.91 | 0.0004 | 187.6 | 362.9 |          | -16.04 |
| D1 | 11/9/2016  | 4.1 | 0.14 | 9.1  | 108.4 | 2.1 | 1.6 | 6.9  | 0.173 | -64.43 | -280.86 | 0.0004 | 235.6 | 411.7 |          | -16.65 |
| D1 | 12/14/2016 | 0.1 | 0.11 | 13.0 | 102.5 | 1.8 | 1.6 | 6.2  | 0.184 | -64.27 | -278.34 | 0.0004 | 220.9 | 345.3 |          | -16.32 |
| D1 | 1/18/2017  | 7.6 | 0.12 | 11.2 | 111.1 | 1.9 | 1.4 | 6.4  | 0.207 | -63.02 | -283.59 | 0.0004 | 221.0 | 379.5 |          | -16.47 |
| D1 | 2/28/2017  | 7.4 | 0.12 | 10.1 | 109.3 | 2.0 | 1.4 | 6.1  | 0.177 | -63.79 | -264.58 | 0.0004 | 220.8 | 336.6 |          | -16.59 |
| D1 | 4/13/2017  | 7.7 | 0.10 | 12.4 | 101.6 | 2.1 | 1.5 | 6.4  | 0.160 | -63.37 | -257.48 | b.d.l. | 239.0 | 411.3 |          | -16.91 |
| D1 | 5/22/2017  | 7.0 | 0.09 | 12.5 | 101.5 | 2.1 | 1.4 | 6.3  | 0.096 | -63.42 | -262.75 | b.d.l. | 202.8 | 332.8 |          | -16.53 |
| D2 | 3/28/2015  | 4.3 | 0.06 | 16.9 | 85.7  | 3.5 | 2.4 | 11.9 | 0.007 |        |         |        | 186.4 | 579.6 |          |        |
| D2 | 4/27/2015  | 5.5 | 0.07 | 13.3 | 102.9 | 2.7 | 3.0 | 8.8  | 0.011 | -41.02 | 148.73  |        | 217.6 | 491.2 |          |        |
| D2 | 5/24/2015  | 5.2 | 0.06 | 12.8 | 98.6  | 2.9 | 2.2 | 8.5  | 0.023 |        | -41.16  | b.d.l. | 193.7 | 455.7 |          |        |
| D2 | 6/17/2015  | 4.2 | 0.06 | 13.9 | 97.6  | 2.4 | 2.6 | 8.3  | 0.018 | -53.00 | 9.89    | b.d.l. | 203.6 | 470.2 | 0.713971 |        |
| D2 | 7/13/2015  | 5.3 | 0.06 | 14.2 | 94.0  | 2.5 | 2.5 | 8.5  | 0.017 | -53.07 | -0.97   | b.d.l. | 192.7 | 476.7 |          |        |
| D2 | 8/11/2015  | 6.4 | 0.07 | 14.0 | 90.8  | 1.9 | 2.3 | 7.5  | 0.306 | -52.55 | -215.51 | b.d.l. | 196.8 | 415.2 |          |        |
| D2 | 9/18/2015  | 5.2 | 0.05 | 10.8 | 91.6  | 2.7 | 2.3 | 8.8  | 0.017 | -57.90 | -73.65  | b.d.l. | 189.0 | 423.5 |          |        |
| D2 | 10/19/2015 | 5.1 | 0.06 | 14.7 | 90.2  | 2.5 | 1.8 | 8.0  | 0.022 | -58.58 | -71.61  | b.d.l. | 184.3 | 446.4 |          |        |



|    |            |     |      |      |       |     |     |      |       |        |         |        |       |       |          |
|----|------------|-----|------|------|-------|-----|-----|------|-------|--------|---------|--------|-------|-------|----------|
| D2 | 11/18/2015 | 2.8 | 0.04 | 14.2 | 89.7  | 2.9 | 2.8 | 9.2  | 0.035 | -56.34 | -172.79 | b.d.l. | 132.6 | 493.3 |          |
| D2 | 1/25/2016  | 5.9 | 0.07 | 14.4 | 100.7 | 3.2 | 2.1 | 10.0 | 0.067 | -68.71 | -192.05 | b.d.l. | 153.1 | 512.5 |          |
| D2 | 2/23/2016  | 4.3 | 0.08 | 15.3 | 96.9  | 2.8 | 2.1 | 9.0  | 0.068 | -68.41 | -207.90 | 0.0004 | 151.3 | 463.5 |          |
| D2 | 3/24/2016  | 3.7 | 0.10 | 8.7  | 100.2 | 3.3 | 1.7 | 9.7  | 0.067 | -67.71 | -222.97 | 0.0004 | 135.9 | 434.1 |          |
| D2 | 4/26/2016  | 4.0 | 0.06 | 9.8  | 100.3 | 2.9 | 1.6 | 9.0  | 0.041 | -66.32 | -222.18 | 0.0004 | 192.1 | 436.8 |          |
| D2 | 6/8/2016   | 5.1 | 0.08 | 12.1 | 107.0 | 3.1 | 2.4 | 9.6  | 0.076 | -64.22 | -248.34 | 0.0004 | 191.6 | 477.0 | 0.713986 |
| D2 | 7/20/2016  | 5.5 | 0.07 | 14.8 | 85.3  | 3.0 | 1.7 | 8.8  | 0.072 | -61.82 | -254.79 | 0.0004 | 193.1 | 503.8 | -16.75   |
| D2 | 8/31/2016  | 3.1 | 0.13 | 9.9  | 93.3  | 2.6 | 1.9 | 8.1  | 0.088 | -61.50 | -269.34 | 0.0004 | 164.5 | 400.6 | -16.83   |
| D2 | 10/5/2016  | 3.7 | 0.03 | 15.8 | 89.9  | 2.8 | 1.5 | 8.7  | 0.097 | -63.18 | -254.56 | 0.0004 | 167.4 | 439.6 | -15.96   |
| D2 | 11/9/2016  | 3.3 | 0.28 | 10.5 | 97.8  | 3.2 | 1.8 | 9.4  | 0.105 | -61.72 | -275.38 | 0.0004 | 201.6 | 535.9 | -16.93   |
| D2 | 12/14/2016 | 0.1 | 0.10 | 15.2 | 93.4  | 2.3 | 1.8 | 7.5  | 0.114 | -63.13 | -263.50 | 0.0004 | 202.8 | 446.6 | -16.48   |
| D2 | 1/18/2017  | 6.0 | 0.09 | 11.9 | 103.3 | 2.6 | 1.7 | 7.9  | 0.135 | -62.69 | -274.82 | 0.0004 | 186.0 | 451.2 | -16.88   |
| D2 | 2/28/2017  | 6.4 | 0.10 | 12.0 | 97.7  | 3.4 | 1.7 | 9.6  | 0.107 | -62.80 | -259.77 | 0.0004 | 171.8 | 421.0 | -16.77   |
| D2 | 4/13/2017  | 8.0 | 0.08 | 18.0 | 94.6  | 3.2 | 1.7 | 9.2  | 0.109 | -59.65 | -268.08 | 0.0004 | 199.3 | 529.6 | -17.21   |
| D3 | 3/28/2015  | 4.0 | 0.07 | 17.9 | 86.5  | 4.5 | 2.5 | 13.8 | 0.006 |        |         |        | 153.3 | 633.3 |          |
| D3 | 4/27/2015  | 4.0 | 0.05 | 17.2 | 93.6  | 4.8 | 3.2 | 13.6 | 0.006 |        |         |        | 163.1 | 687.4 |          |
| D3 | 5/24/2015  | 3.8 | 0.04 | 17.4 | 78.8  | 4.3 | 2.0 | 12.7 | 0.007 | -32.58 |         | b.d.l. | 153.7 | 624.9 |          |
| D3 | 6/17/2015  | 2.5 | 0.04 | 18.1 | 83.9  | 4.3 | 2.7 | 13.0 | 0.007 |        |         | b.d.l. | 152.0 | 658.4 | 0.713952 |
| D3 | 7/13/2015  | 3.6 | 0.06 | 17.7 | 83.5  | 4.1 | 2.6 | 12.8 | 0.006 |        |         | b.d.l. | 153.9 | 629.2 |          |
| D3 | 8/11/2015  | 3.7 | 0.05 | 18.0 | 79.7  | 4.0 | 2.3 | 12.4 | 0.008 |        |         | b.d.l. | 145.4 | 596.0 |          |
| D3 | 9/18/2015  | 3.5 | 0.04 | 15.0 | 83.1  | 4.3 | 2.6 | 13.0 | 0.004 |        |         | b.d.l. | 145.1 | 571.6 |          |
| D3 | 10/19/2015 | 3.5 | 0.05 | 18.1 | 81.5  | 4.1 | 2.2 | 12.7 | 0.008 |        |         | b.d.l. | 108.0 | 593.5 |          |
| D3 | 11/18/2015 | 2.2 | 0.02 | 16.2 | 83.4  | 4.3 | 3.0 | 13.0 | 0.010 | -47.03 |         | b.d.l. | 112.3 | 679.9 |          |
| D3 | 1/25/2016  | 4.1 | 0.04 | 20.1 | 87.1  | 4.7 | 2.4 | 14.0 | 0.020 | -57.35 | -108.77 | b.d.l. | 125.2 | 648.3 |          |
| D3 | 2/23/2016  | 3.5 | 0.06 | 24.5 | 84.9  | 4.6 | 2.5 | 13.5 | 0.017 | -55.28 | -91.91  | 0.0004 | 121.7 | 637.7 |          |
| D3 | 3/24/2016  | 2.8 | 0.04 | 9.5  | 90.3  | 5.0 | 1.9 | 14.3 | 0.024 | -61.02 | -178.40 | 0.0004 | 115.3 | 620.4 |          |
| D3 | 4/26/2016  | 2.8 | 0.04 | 10.1 | 77.1  | 4.1 | 2.1 | 11.7 | 0.018 | -56.46 | -208.73 | 0.0004 | 163.7 | 668.2 |          |
| D3 | 6/8/2016   | 4.9 | 0.06 | 14.8 | 90.4  | 5.0 | 2.3 | 14.3 | 0.031 | -57.41 | -201.89 | 0.0004 | 163.2 | 719.6 | 0.713998 |
| D3 | 7/20/2016  | 5.5 | 0.11 | 17.0 | 78.7  | 4.5 | 1.7 | 12.3 | 0.027 | -57.65 | -244.34 | 0.0004 | 161.1 | 646.6 | -17.09   |
| D3 | 8/31/2016  | 2.7 | 0.12 | 11.6 | 84.5  | 4.7 | 2.0 | 13.2 | 0.042 | -55.71 | -241.49 | 0.0004 | 140.5 | 586.5 | -17.15   |
| D3 | 10/5/2016  | 3.3 | 0.03 | 19.3 | 77.7  | 4.4 | 1.7 | 12.4 | 0.042 | -54.91 | -248.80 | 0.0004 | 149.2 | 604.9 | -16.65   |
| D3 | 11/9/2016  | 3.5 | 0.17 | 13.7 | 90.5  | 5.1 | 2.0 | 14.2 | 0.048 | -55.74 | -237.44 | 0.0004 | 160.4 | 705.8 | -17.33   |
| D3 | 12/14/2016 | 0.1 | 0.09 | 19.3 | 73.3  | 3.9 | 1.8 | 11.5 | 0.048 | -55.33 | -229.54 | 0.0004 | 163.6 | 726.1 | -16.87   |
| D3 | 1/18/2017  | 5.4 | 0.10 | 13.6 | 92.1  | 5.1 | 1.9 | 14.7 | 0.051 | -56.11 | -232.90 | 0.0004 | 150.9 | 759.2 | -17.38   |

|    |            |        |        |      |       |      |     |      |        |         |         |        |        |        |          |          |       |
|----|------------|--------|--------|------|-------|------|-----|------|--------|---------|---------|--------|--------|--------|----------|----------|-------|
| D3 | 2/28/2017  | 6.6    | 0.11   | 15.6 | 88.0  | 5.2  | 1.9 | 14.3 | 0.036  | -51.59  | -221.35 | 0.0004 | 166.9  | 727.1  | -17.19   |          |       |
| D3 | 4/13/2017  | 7.2    | 0.10   | 17.6 | 85.2  | 5.0  | 1.9 | 13.9 | 0.043  | -52.46  | -226.04 | b.d.l. | 172.3  | 735.8  | -17.51   |          |       |
| D3 | 5/22/2017  | 5.8    | 0.06   | 14.1 | 94.7  | 2.5  | 1.8 | 7.3  | 0.087  | -60.76  | -263.38 | b.d.l. | 201.6  | 392.3  | -16.73   |          |       |
| D3 | 5/22/2017  | 6.1    | 0.07   | 17.9 | 85.5  | 4.9  | 2.0 | 13.6 | 0.041  | -52.99  | -229.52 | b.d.l. | 147.7  | 584.9  | -17.01   |          |       |
| F1 | 1/30/2015  | 2.3    | b.d.l. | 26.4 | 16.7  | 15.4 | 1.9 | 37.3 | 0.002  | -28.77  | -146.36 |        | 23.2   | 424.2  |          |          |       |
| F1 | 2/12/2015  | 2.4    | b.d.l. | 16.0 | 18.8  | 13.5 | 1.9 | 37.4 | 0.003  | -39.37  | -263.12 |        | 24.3   | 462.2  |          |          |       |
| F1 | 3/29/2015  | 2.6    | 0.01   | 20.7 | 18.7  | 14.0 | 2.3 | 37.6 | 0.003  | -30.32  | -366.79 |        | 24.2   | 429.4  |          |          |       |
| F1 | 4/26/2015  | 2.7    | 0.04   | 12.7 | 22.7  | 15.9 | 3.0 | 40.7 | 0.006  | -50.96  | -185.78 |        | 26.4   | 521.0  |          |          |       |
| F1 | 5/23/2015  | 1.6    | 0.02   | 11.8 | 14.6  | 14.5 | 1.3 | 36.9 | 0.007  | -54.36  | -178.02 | b.d.l. | 25.3   | 538.3  |          |          |       |
| F1 | 6/17/2015  | 1.5    | 0.02   | 18.4 | 16.3  | 14.9 | 2.1 | 38.5 | 0.004  | -39.92  | -240.20 | b.d.l. | 24.3   | 518.5  | 0.713907 |          |       |
| F1 | 7/15/2015  | 1.5    | 0.01   | 17.4 | 18.7  | 12.6 | 2.5 | 32.9 | 0.004  | -40.36  | -221.01 | b.d.l. | 25.8   | 478.9  |          |          |       |
| F1 | 8/10/2015  | 1.5    | 0.01   | 17.5 | 15.9  | 14.2 | 2.1 | 36.7 | 0.003  | -35.91  | -208.46 | b.d.l. | 24.0   | 478.6  |          |          |       |
| F1 | 9/15/2015  | 1.1    | 0.01   | 16.5 | 14.0  | 13.9 | 2.7 | 36.2 | 0.003  | -40.32  | -177.26 | b.d.l. | 18.8   | 457.7  |          |          |       |
| F1 | 10/22/2015 | 1.0    | 0.03   | 16.2 | 17.6  | 13.5 | 1.3 | 35.1 | 0.006  | -41.99  | -191.13 | b.d.l. | 19.7   | 495.7  |          |          |       |
| F1 | 11/19/2015 | 0.8    | 0.01   | 18.9 | 17.2  | 13.5 | 2.7 | 35.1 | 0.003  | -43.50  | -151.02 | b.d.l. | 19.6   | 519.1  |          |          |       |
| F1 | 1/25/2016  | 0.9    | 0.01   | 16.4 | 11.8  | 13.2 | 1.6 | 32.4 | 0.004  | -66.66  | -213.02 | b.d.l. | 20.4   | 519.6  |          |          |       |
| F1 | 2/24/2016  | 0.9    | 0.02   | 25.7 | 16.9  | 14.0 | 1.8 | 34.7 | 0.005  | -77.89  | -269.75 | 0.0004 | 20.6   | 473.2  |          |          |       |
| F1 | 3/23/2016  | b.d.l. | 0.01   | 12.4 | 12.6  | 14.3 | 1.4 | 35.2 | 0.007  | -84.89  | -296.85 | 0.0004 | 22.0   | 455.4  |          |          |       |
| F1 | 4/29/2016  | 0.7    | b.d.l. | 10.3 | 12.5  | 13.1 | 1.8 | 31.8 | 0.010  | -96.76  | -328.30 | 0.0004 | 25.5   | 482.1  |          |          |       |
| F1 | 6/9/2016   | 0.6    | 0.01   | 12.3 | 10.8  | 13.4 | 1.6 | 32.4 | 0.012  | -104.75 | -340.17 | 0.0004 | 25.2   | 512.7  | 0.713886 |          |       |
| F1 | 7/20/2016  | b.d.l. | 0.01   | 14.3 | 11.2  | 12.2 | 1.4 | 29.8 | 0.012  | -106.27 | -330.83 | 0.0004 | 27.7   | 516.1  | -17.42   |          |       |
| F1 | 9/1/2016   | 0.8    | 0.06   | 20.0 | 10.7  | 12.8 | 1.7 | 31.0 | 0.018  | -106.83 | -355.03 | 0.0004 | 30.4   | 462.7  | -17.54   |          |       |
| F1 | 10/6/2016  | 0.8    | 0.02   | 15.5 | 9.5   | 12.0 | 1.2 | 29.4 | 0.017  | -107.26 | -357.18 | 0.0004 | 18.3   | 449.7  | -17.12   |          |       |
| F1 | 11/7/2016  | 0.6    | 0.03   | 12.0 | 12.3  | 13.9 | 1.7 | 33.9 | 0.020  | -105.05 | -343.49 | 0.0004 | 27.0   | 578.6  | -17.42   |          |       |
| F1 | 12/14/2016 | 0.8    | b.d.l. | 15.7 | 8.3   | 11.4 | 1.3 | 28.0 | 0.021  | -108.42 | -350.78 | 0.0004 | 25.1   | 531.6  | -17.16   |          |       |
| F1 | 1/18/2017  | 0.9    | 0.02   | 12.9 | 10.7  | 12.4 | 1.3 | 30.1 | 0.021  | -108.53 | -351.49 | 0.0004 | 23.4   | 542.6  | -17.49   |          |       |
| F1 | 2/28/2017  | 0.9    | 0.02   | 12.5 | 12.0  | 13.6 | 1.4 | 32.8 | 0.018  | -109.24 | -350.57 | 0.0004 | 25.7   | 531.8  | -17.19   |          |       |
| F1 | 4/14/2017  | 0.9    | 0.02   | 14.4 | 11.0  | 13.2 | 1.5 | 31.8 | 0.021  | -109.35 | -347.56 | 0.0004 | 25.7   | 561.8  | -17.70   |          |       |
| F1 | 5/22/2017  | 0.8    | b.d.l. | 14.6 | 10.8  | 13.1 | 1.5 | 31.7 | 0.020  | -79.68  | -279.15 | b.d.l. | 17.8   | 428.7  | -17.16   |          |       |
| H1 | 4/25/2015  |        |        |      |       |      |     |      | 3.907  | -51.24  | -219.58 |        |        |        |          |          |       |
| H1 | 6/4/2015   | 740.6  | 9.15   | 14.8 | 565.1 | 0.8  | 7.3 | 4.6  | 14.085 | -54.51  | -226.94 | 0.0090 | -34.61 | 1788.0 | 587.9    | 0.714031 | -3.98 |
| H1 | 7/14/2015  | 711.6  | 8.46   | 11.0 | 607.7 | 1.2  | 4.0 | 5.0  | 24.055 | -55.01  | -220.60 | 0.0162 |        | 1703.9 | 568.9    |          |       |
| H1 | 7/28/2015  | 510.1  | 7.05   | 6.9  | 465.4 | 0.4  | 5.5 | 2.7  | 22.206 | -55.41  | -221.71 | 0.0146 | -43.60 | 1323.9 | 249.6    |          |       |
| H1 | 8/13/2015  | 312.9  | 3.79   | 8.4  | 258.9 | 0.1  | 3.5 | 1.1  | 23.784 | -52.29  | -218.59 | 0.0187 | -34.99 | 898.7  | 122.6    |          | -9.09 |

|    |            |        |       |        |        |        |      |      |        |        |         |        |        |        |        |          |        |
|----|------------|--------|-------|--------|--------|--------|------|------|--------|--------|---------|--------|--------|--------|--------|----------|--------|
| H1 | 9/16/2015  | 220.2  | 2.33  | 7.3    | 235.5  | b.d.l. | 2.4  | 0.6  | 18.265 | -50.42 | -219.91 | 0.0157 | -35.65 | 717.4  | 85.9   |          | -10.93 |
| H1 | 10/20/2015 | 348.5  | 4.33  | 8.4    | 318.1  | 0.2    | 4.6  | 0.9  | 29.663 | -46.71 | -220.68 | 0.0254 | -34.87 | 996.9  | 144.6  |          | -7.95  |
| H1 | 11/17/2015 | 576.6  | 7.54  | 5.2    | 450.4  | 0.2    | 7.1  | 2.2  | 50.872 | -46.59 | -221.35 | 0.0396 | -35.51 | 1434.8 | 261.6  |          |        |
| H1 | 1/8/2016   | 784.2  | 5.40  | 0.7    | 555.6  | 0.4    | 5.4  | 3.3  | 55.524 | -45.16 | -222.36 | 0.0427 | -37.21 | 2588.6 | 457.8  |          | -0.57  |
| H1 | 2/8/2016   | 870.0  | 18.64 | 1.7    | 740.4  | 0.8    | 5.4  | 5.2  | 59.594 | -46.40 | -223.78 | 0.0461 | -34.86 | 3351.1 | 666.7  |          |        |
| H1 | 3/24/2016  | 1040.4 | 16.29 | 0.8    | 842.8  | 1.1    | 7.9  | 6.9  | 52.294 | -45.89 | -224.12 | 0.0420 |        | 4442.5 | 939.2  |          |        |
| H1 | 4/27/2016  | 1572.1 | 22.44 | 0.9    | 1066.2 | 2.0    | 6.6  | 9.7  | 52.541 | -45.48 | -223.41 | 0.0434 | -35.15 | 4388.1 | 1359.6 |          | 9.54   |
| H1 | 6/8/2016   | 1329.6 | 23.78 | 0.1    | 1182.4 | 1.8    | 7.2  | 10.2 | 58.131 | -42.37 | -202.87 | 0.0470 | -38.23 | 6344.2 | 1658.5 | 0.713960 |        |
| H1 | 7/19/2016  | 1874.9 | 24.84 | b.d.l. | 1309.2 | 2.5    | 7.3  | 13.4 | 48.781 | -45.04 | -233.25 | 0.0400 | -35.06 | 5234.2 | 1762.4 |          | 10.44  |
| H1 | 8/31/2016  | 2191.5 | 24.49 | b.d.l. | 1407.7 | 3.4    | 7.9  | 16.3 | 59.339 | -44.36 | -234.86 | 0.0479 | -35.23 | 6108.4 | 2700.6 |          | 12.90  |
| H1 | 10/5/2016  | 2455.0 | 30.21 | b.d.l. | 1484.6 | 3.5    | 9.3  | 17.3 | 57.288 | -44.83 | -234.98 | 0.0449 | -34.96 | 6261.2 | 3350.5 |          | 14.71  |
| H1 | 11/6/2016  | 2501.0 | 31.98 | b.d.l. | 1691.5 | 4.0    | 9.7  | 19.7 | 57.111 | -44.40 | -233.68 | 0.0505 | -35.02 | 7494.7 | 3911.9 |          | 15.61  |
| H1 | 12/12/2016 | 2579.4 | 43.92 | b.d.l. | 1546.5 | 4.0    | 9.8  | 19.9 | 65.161 | -45.99 | -236.35 | 0.0566 | -34.90 | 6977.3 | 4533.2 |          | 17.47  |
| H1 | 1/16/2017  | 2499.4 | 28.11 | b.d.l. | 1634.9 | 4.3    | 10.0 | 20.2 | 71.369 | -47.10 | -236.76 | 0.0574 | -35.01 | 7235.3 | 3677.2 |          | 18.04  |
| H1 | 3/1/2017   | 2400.8 | 33.73 | b.d.l. | 1514.2 | 3.9    | 9.2  | 18.4 | 66.532 | -46.37 | -225.92 | 0.0516 | -34.78 | 6091.1 | 3519.7 |          | 17.68  |
| H1 | 4/13/2017  | 1916.1 | 29.41 | b.d.l. | 1459.3 | 3.1    | 7.9  | 14.5 | 68.230 | -47.12 | -227.16 | 0.0541 | -34.95 | 7474.9 | 2661.3 |          | 15.36  |
| H1 | 5/22/2017  | 2111.7 | 22.91 | 0.1    | 1367.1 | 3.0    | 8.8  | 14.5 | 42.830 | -47.44 | -226.45 | 0.0351 | -34.83 | 6042.3 | 3107.8 |          | 15.14  |
| H2 | 6/4/2015   | 34.9   | 0.36  | 27.1   | 114.0  | 0.8    | 3.7  | 0.9  | 3.094  | -58.28 | -225.31 | 0.0019 |        | 258.4  | 87.0   | 0.713997 | -13.86 |
| H2 | 7/14/2015  | 54.6   | 0.41  | 27.7   | 134.5  | 0.3    | 3.3  | 0.7  | 3.926  | -57.52 | -229.30 | 0.0033 |        | 370.3  | 58.7   |          |        |
| H2 | 7/28/2015  | 55.5   | 0.43  | 26.2   | 120.7  | 0.4    | 2.5  | 0.5  | 4.698  | -57.17 | -228.82 | 0.0035 |        | 264.4  | 50.7   |          |        |
| H2 | 8/13/2015  | 68.6   | 0.48  | 24.2   | 136.8  | 0.9    | 2.7  | 1.1  | 5.257  | -53.06 | -226.35 | 0.0037 |        | 299.6  | 80.2   |          |        |
| H2 | 9/16/2015  | 103.5  | 1.10  | 20.1   | 174.4  | 0.2    | 2.3  | 1.1  | 8.180  | -52.36 | -221.23 | 0.0051 |        | 412.1  | 101.8  |          | -13.27 |
| H2 | 10/20/2015 | 195.7  | 2.45  | 20.2   | 246.3  | b.d.l. | 5.5  | 0.8  | 15.801 | -50.80 | -218.59 | 0.0082 |        | 551.3  | 98.9   |          |        |
| H2 | 11/17/2015 | 381.2  | 4.40  | 16.7   | 324.2  | 0.4    | 2.1  | 2.1  | 22.051 | -50.70 | -218.52 | 0.0109 |        | 810.6  | 170.7  |          |        |
| H2 | 1/8/2016   | 232.5  | 2.32  | 8.6    | 297.9  | 0.2    | 2.8  | 2.0  | 31.130 | -50.03 | -224.71 | 0.0166 | -34.05 | 867.7  | 187.9  |          | -10.36 |
| H2 | 2/8/2016   | 344.0  | 6.28  | 21.5   | 376.2  | 0.2    | 3.5  | 2.6  | 26.403 | -49.04 | -224.26 | 0.0164 | -34.34 | 1009.0 | 223.6  |          |        |
| H2 | 3/24/2016  | 335.3  | 6.22  | 10.2   | 360.6  | 0.1    | 4.1  | 2.3  | 26.220 | -50.12 | -223.94 | 0.0152 | -35.19 | 921.8  | 186.7  |          |        |
| H2 | 4/27/2016  | 120.4  | 1.95  | 4.7    | 257.2  | b.d.l. | 1.7  | 1.3  | 24.594 | -51.64 | -225.35 | 0.0141 |        | 927.7  | 144.0  |          | -9.98  |
| H2 | 6/8/2016   | 373.1  | 4.82  | 6.6    | 461.4  | 0.3    | 3.6  | 3.4  | 30.126 | -46.42 | -216.52 | 0.0176 | -32.48 | 1415.7 | 297.7  | 0.713942 |        |
| H2 | 7/19/2016  | 530.5  | 6.13  | 6.9    | 466.4  | 0.5    | 3.3  | 3.6  | 37.885 | -49.90 | -228.76 | 0.0215 | -33.88 | 1291.3 | 338.7  |          | -8.35  |
| H2 | 8/31/2016  | 542.2  | 7.19  | 7.4    | 431.3  | 0.4    | 3.2  | 3.0  | 41.271 | -49.56 | -227.86 | 0.0217 | -33.99 | 1118.3 | 292.2  |          | -8.76  |
| H2 | 10/5/2016  | 512.0  | 6.71  | 7.9    | 437.6  | 0.4    | 3.0  | 3.1  | 43.416 | -48.94 | -225.73 | 0.0224 | -34.08 | 1098.5 | 291.5  |          | -8.12  |
| H2 | 11/6/2016  | 555.9  | 4.65  | 4.8    | 471.1  | 0.5    | 2.9  | 3.2  | 45.742 | -48.56 | -239.04 | 0.0261 | -34.23 | 1383.4 | 355.7  |          | -8.72  |
| H2 | 12/12/2016 | 391.8  | 5.26  | 9.3    | 371.1  | b.d.l. | 2.4  | 2.0  | 45.869 | -48.36 | -236.07 | 0.0271 |        | 843.8  | 200.0  |          | -9.97  |

|    |            |       |      |      |       |        |     |     |        |        |         |        |        |       |       |          |
|----|------------|-------|------|------|-------|--------|-----|-----|--------|--------|---------|--------|--------|-------|-------|----------|
| H2 | 1/16/2017  | 266.3 | 4.38 | 7.3  | 312.2 | b.d.l. | 1.7 | 1.5 | 45.739 | -48.87 | -237.74 | 0.0265 | -34.52 | 919.7 | 167.1 | -10.51   |
| H2 | 3/1/2017   | 253.7 | 3.89 | 7.4  | 311.9 | 0.2    | 1.9 | 1.6 | 41.106 | -47.97 | -228.14 | 0.0241 | -34.37 | 762.3 | 166.5 | -10.40   |
| H2 | 4/13/2017  | 177.7 | 2.55 | 4.8  | 275.9 | 0.1    | 1.7 | 1.1 | 41.404 | -48.09 | -229.92 | 0.0255 | -34.19 | 921.9 | 121.9 | -11.36   |
| H2 | 5/22/2017  | 322.9 | 4.26 | 3.4  | 344.3 | b.d.l. | 2.2 | 1.6 | 35.514 | -48.50 | -226.36 | 0.0230 | -34.35 | 855.7 | 166.0 | -8.38    |
| L1 | 2/11/2015  | 49.9  | 0.73 | 9.8  | 95.4  | 0.2    | 1.5 | 2.3 | 6.530  | -51.48 |         |        |        | 255.5 | 71.7  |          |
| L1 | 2/22/2015  | 75.1  | 0.99 | 10.5 | 124.3 | 0.4    | 3.0 | 1.5 | 7.081  | -49.45 |         |        |        | 293.5 | 58.8  |          |
| L1 | 4/11/2015  | 117.4 | 1.38 | 4.1  | 188.0 | 0.4    | 2.8 | 1.4 | 8.868  | -50.67 |         |        |        | 678.9 | 88.0  |          |
| L1 | 4/26/2015  | 177.5 | 2.20 | 3.2  | 229.5 | 0.2    | 4.6 | 1.7 |        |        |         |        |        | 487.8 | 97.5  |          |
| L1 | 5/24/2015  | 193.5 | 2.54 | 1.0  | 239.9 | 0.2    | 2.0 | 1.4 | 15.682 | -54.01 | -224.43 | 0.0070 | -39.59 | 709.6 | 117.2 |          |
| L1 | 6/19/2015  | 240.6 | 2.54 | 0.4  | 242.3 | 0.3    | 2.3 | 1.8 | 16.527 | -54.50 | -225.75 | 0.0079 | -35.74 | 656.5 | 139.8 | 0.713562 |
| L1 | 7/14/2015  | 217.5 | 2.61 | 0.3  | 225.2 | 0.1    | 3.9 | 1.2 | 21.441 | -54.00 | -223.41 | 0.0104 |        | 589.8 | 121.3 |          |
| L1 | 8/11/2015  | 213.4 | 2.68 | 0.3  | 254.5 | 0.1    | 3.6 | 1.4 | 16.238 | -53.17 | -224.06 | 0.0073 | -38.43 | 581.6 | 118.0 |          |
| L1 | 9/16/2015  | 222.2 | 2.00 | 0.3  | 247.1 | b.d.l. | 2.9 | 1.1 | 15.255 | -56.52 | -222.24 | 0.0070 |        | 598.3 | 111.8 |          |
| L1 | 10/22/2015 | 218.6 | 2.79 | 0.4  | 238.0 | b.d.l. | 1.8 | 0.9 | 21.491 | -56.49 | -224.02 | 0.0103 | -40.35 | 571.3 | 118.2 |          |
| L1 | 1/8/2016   | 147.8 | 1.88 | 0.2  | 246.1 | b.d.l. | 2.4 | 1.0 | 21.650 | -56.93 | -223.93 | 0.0099 |        | 593.1 | 113.0 |          |
| L1 | 2/9/2016   | 210.2 | 3.52 | 0.3  | 251.6 | b.d.l. | 2.5 | 0.9 | 23.565 | -56.43 | -228.77 | 0.0109 |        | 520.4 | 107.4 |          |
| L1 | 3/22/2016  | 219.8 | 1.88 | 0.1  | 255.5 | b.d.l. | 1.5 | 0.9 | 16.550 | -57.25 | -225.03 | 0.0081 |        | 552.8 | 104.0 |          |
| L1 | 4/28/2016  | 186.2 | 3.59 | 0.5  | 253.4 | b.d.l. | 1.9 | 0.8 |        | -55.37 | -228.08 |        |        | 727.5 | 106.2 |          |
| L1 | 6/7/2016   | 184.4 | 2.47 | 0.3  | 265.3 | b.d.l. | 2.2 | 0.8 | 22.040 | -55.44 | -229.11 | 0.0104 | -37.59 | 767.0 | 108.2 | 0.713810 |
| L1 | 7/21/2016  | 214.2 | 2.72 | 0.4  | 254.8 | b.d.l. | 1.7 | 0.8 | 18.850 | -55.27 | -242.14 | 0.0081 | -37.12 | 638.2 | 101.5 | -6.55    |
| L1 | 8/30/2016  | 201.2 | 2.28 | 0.2  | 246.4 | b.d.l. | 1.7 | 0.8 | 20.177 | -57.67 | -242.79 | 0.0095 | -37.19 | 671.0 | 106.0 | -6.39    |
| L1 | 10/2/2016  | 187.0 | 2.83 | 0.2  | 250.0 | b.d.l. | 1.7 | 0.8 | 14.265 | -55.63 | -240.78 | 0.0071 | -37.17 | 600.4 | 99.4  | -5.70    |
| L1 | 11/8/2016  | 187.6 | 1.98 | 0.3  | 256.0 | b.d.l. | 1.6 | 0.8 | 21.197 | -54.99 | -237.58 | 0.0100 | -37.33 | 714.8 | 104.1 | -6.61    |
| L1 | 12/13/2016 | 198.2 | 2.16 | 0.3  | 226.1 | b.d.l. | 1.5 | 0.6 | 23.377 | -54.95 | -233.15 | 0.0108 | -37.32 | 692.6 | 117.2 | -6.53    |
| L1 | 1/17/2017  | 205.1 | 3.47 | 0.5  | 252.9 | b.d.l. | 1.7 | 0.8 | 23.514 | -55.04 | -234.69 | 0.0104 | -37.26 | 690.7 | 116.0 | -6.58    |
| L1 | 3/1/2017   | 201.5 | 3.73 | 0.4  | 253.1 | b.d.l. | 1.7 | 0.8 | 20.938 | -56.74 | -227.76 | 0.0098 | -37.20 | 507.8 | 91.0  | -6.60    |
| L1 | 4/12/2017  | 194.9 | 1.68 | 0.6  | 256.5 | b.d.l. | 1.9 | 0.7 | 21.201 | -57.74 | -229.70 | 0.0103 | -37.21 | 853.3 | 114.7 | -6.17    |
| L1 | 5/25/2017  | 174.1 | 3.67 | 0.3  | 258.9 | b.d.l. | 1.8 | 0.7 | 23.576 | -57.18 | -231.84 | 0.0111 | -37.19 | 661.8 | 96.7  | -6.85    |
| L2 | 2/11/2015  | 17.7  | 0.20 | 8.7  | 78.8  | 0.8    | 2.2 | 4.3 | 1.925  | -57.68 |         |        |        | 130.9 | 126.3 |          |
| L2 | 2/22/2015  | 12.2  | 0.15 | 6.6  | 95.0  | 0.2    | 2.3 | 2.3 | 1.951  | -61.23 |         |        |        | 192.4 | 83.6  |          |
| L2 | 4/11/2015  | 47.9  | 0.71 | 8.3  | 125.8 | 0.2    | 3.5 | 1.9 | 1.673  | -66.33 |         |        |        | 395.0 | 108.6 |          |
| L2 | 4/26/2015  | 49.5  | 0.79 | 6.0  | 129.1 | 0.2    | 3.1 | 1.7 |        |        |         |        |        | 347.7 | 99.3  |          |
| L2 | 5/24/2015  | 52.3  | 0.88 | 4.0  | 126.6 | 0.1    | 3.1 | 1.4 | 3.909  | -67.98 | -224.56 | 0.0017 |        | 318.8 | 107.5 |          |
| L2 | 6/19/2015  | 35.4  | 0.87 | 5.0  | 146.8 | 0.1    | 2.8 | 1.9 | 4.805  | -67.51 | -229.95 | 0.0023 |        | 353.9 | 121.5 | 0.713474 |

|    |            |       |      |     |       |        |     |      |        |        |         |        |        |       |       |          |        |
|----|------------|-------|------|-----|-------|--------|-----|------|--------|--------|---------|--------|--------|-------|-------|----------|--------|
| L2 | 7/14/2015  | 54.0  | 0.80 | 3.1 | 142.4 | 0.1    | 3.3 | 1.5  | 4.146  | -67.63 | -230.28 | 0.0021 |        | 350.4 | 100.1 |          |        |
| L2 | 8/11/2015  | 56.6  | 0.86 | 3.1 | 134.7 | 0.1    | 3.0 | 1.4  | 3.412  | -67.08 | -221.20 | 0.0017 |        | 350.4 | 95.8  |          |        |
| L2 | 9/16/2015  | 48.3  | 0.75 | 1.8 | 152.0 | b.d.l. | 2.7 | 1.2  | 2.844  | -68.95 | -229.74 | 0.0015 |        | 343.6 | 92.3  |          |        |
| L2 | 10/22/2015 | 78.9  | 0.85 | 3.8 | 149.6 | 0.1    | 1.4 | 1.2  | 5.724  | -69.26 | -230.64 | 0.0028 |        | 344.2 | 95.4  |          |        |
| L2 | 1/8/2016   | 41.2  | 0.61 | 1.4 | 132.5 | b.d.l. | 1.5 | 1.1  | 5.601  | -68.29 | -234.24 | 0.0028 |        | 310.4 | 100.0 |          |        |
| L2 | 2/9/2016   | 57.3  | 1.22 | 2.8 | 162.6 | b.d.l. | 2.3 | 1.3  | 6.742  | -69.38 | -236.53 | 0.0033 |        | 300.7 | 90.1  |          |        |
| L2 | 3/22/2016  | 45.9  | 0.93 | 1.8 | 168.4 | b.d.l. | 2.6 | 1.4  | 4.361  | -69.57 | -240.73 | 0.0023 |        | 324.8 | 97.4  |          |        |
| L2 | 4/28/2016  | 63.2  | 0.94 | 2.0 | 171.5 | b.d.l. | 2.2 | 1.3  | 6.891  | -68.82 | -237.39 | 0.0033 |        | 395.1 | 98.7  |          |        |
| L2 | 6/7/2016   | 61.4  | 1.08 | 3.7 | 178.0 | b.d.l. | 2.2 | 1.3  | 7.454  | -68.06 | -235.68 | 0.0034 | -35.44 | 429.3 | 103.9 | 0.713769 |        |
| L2 | 7/21/2016  | 62.8  | 1.26 | 3.2 | 153.3 | b.d.l. | 1.6 | 1.2  | 4.835  | -68.94 | -256.16 | 0.0022 | -34.59 | 444.3 | 101.5 |          | -11.90 |
| L2 | 8/30/2016  | 53.6  | 0.99 | 1.6 | 166.4 | b.d.l. | 1.9 | 1.3  | 6.834  | -70.12 | -255.53 | 0.0034 | -34.56 | 419.4 | 100.4 |          | -11.71 |
| L2 | 10/2/2016  | 48.9  | 0.20 | 1.4 | 169.1 | b.d.l. | 1.9 | 1.2  | 3.523  | -69.42 | -256.47 | 0.0019 | -34.89 | 366.6 | 95.8  |          | -11.38 |
| L2 | 11/8/2016  | 44.3  | 1.04 | 1.5 | 177.7 | b.d.l. | 1.8 | 1.4  | 7.181  | -71.89 | -256.12 | 0.0034 | -34.77 | 425.4 | 103.3 |          | -12.27 |
| L2 | 12/13/2016 | 62.3  | 1.77 | 1.9 | 160.2 | b.d.l. | 1.8 | 1.1  | 7.414  | -71.68 | -257.89 | 0.0037 | -34.80 | 438.3 | 111.2 |          | -12.16 |
| L2 | 1/17/2017  | 58.9  | 1.26 | 1.6 | 175.8 | b.d.l. | 1.9 | 1.4  | 7.004  | -72.23 | -252.83 | 0.0033 | -34.92 | 401.1 | 110.6 |          | -12.30 |
| L2 | 3/1/2017   | 60.0  | 1.05 | 2.1 | 174.9 | 0.1    | 1.9 | 1.3  | 6.511  | -71.20 | -245.19 | 0.0030 | -34.59 | 512.9 | 111.7 |          | -12.72 |
| L2 | 4/12/2017  | 71.9  | 1.26 | 3.3 | 174.8 | b.d.l. | 1.8 | 1.2  | 7.093  | -70.79 | -244.01 | 0.0035 | -34.93 | 479.3 | 114.2 |          | -12.15 |
| L2 | 5/25/2017  | 74.2  | 1.05 | 2.1 | 173.8 | b.d.l. | 2.0 | 1.2  | 6.952  | -71.17 | -241.79 | 0.0034 | -34.52 | 444.1 | 95.6  |          | -12.54 |
| L3 | 2/11/2015  | 5.8   | 0.07 | 6.1 | 63.1  | 2.5    | 2.9 | 10.2 | 0.617  | -47.47 |         |        |        | 78.3  | 292.1 |          |        |
| L3 | 2/22/2015  | 23.6  | 0.28 | 9.5 | 94.3  | 0.7    | 3.0 | 4.4  | 2.136  | -55.33 |         |        |        | 179.2 | 201.5 |          |        |
| L3 | 4/11/2015  | 96.0  | 1.26 | 2.8 | 135.5 | 0.5    | 3.4 | 3.1  | 3.648  | -52.73 |         |        |        | 372.2 | 283.4 |          |        |
| L3 | 5/24/2015  | 94.9  | 1.24 | 0.4 | 164.6 | 0.5    | 3.5 | 3.0  | 8.500  | -53.95 | -223.15 | 0.0020 |        | 380.0 | 230.5 |          |        |
| L3 | 6/19/2015  | 87.1  | 1.22 | 0.2 | 150.8 | 0.2    | 3.6 | 2.6  | 9.079  | -54.04 | -221.57 | 0.0023 |        | 397.5 | 244.4 | 0.713596 |        |
| L3 | 7/14/2015  | 85.2  | 1.15 | 0.2 | 137.3 | 0.3    | 3.3 | 2.1  | 11.885 | -54.03 | -221.95 | 0.0030 |        |       |       |          |        |
| L3 | 8/11/2015  | 84.1  | 1.12 | 0.2 | 131.5 | 0.1    | 3.0 | 2.0  | 7.718  | -52.49 | -222.79 | 0.0019 |        | 371.2 | 205.7 |          |        |
| L3 | 9/16/2015  | 65.6  | 0.99 | 0.2 | 139.8 | b.d.l. | 2.2 | 1.9  | 6.791  | -55.38 | -221.58 | 0.0017 |        | 314.9 | 208.1 |          |        |
| L3 | 10/22/2015 | 88.0  | 1.26 | 0.3 | 151.0 | 0.1    | 3.3 | 1.7  | 11.391 | -55.83 | -225.44 | 0.0028 |        | 354.1 | 195.9 |          |        |
| L3 | 1/8/2016   | 72.5  | 1.13 | 0.2 | 134.1 | b.d.l. | 2.0 | 1.6  | 11.524 | -56.04 | -226.63 | 0.0029 |        | 317.7 | 208.2 |          |        |
| L3 | 2/9/2016   | 91.5  | 1.73 | 0.1 | 152.1 | 0.1    | 2.3 | 1.7  | 12.905 | -55.94 | -226.94 | 0.0030 |        | 315.7 | 184.1 |          |        |
| L3 | 3/22/2016  | 69.3  | 1.24 | 0.1 | 165.1 | b.d.l. | 2.7 | 1.9  | 9.707  | -55.88 | -227.85 | 0.0024 |        | 339.8 | 191.7 |          |        |
| L3 | 4/28/2016  | 96.1  | 1.25 | 0.1 | 142.7 | b.d.l. | 1.8 | 1.4  | 12.070 | -54.89 | -225.17 | 0.0030 |        | 430.0 | 197.7 |          |        |
| L3 | 6/7/2016   | 90.1  | 1.71 | 0.1 | 169.5 | 0.1    | 2.4 | 1.8  | 13.602 | -55.57 | -226.06 | 0.0034 |        | 456.2 | 205.2 | 0.713718 |        |
| L3 | 7/21/2016  | 100.9 | 1.64 | 0.1 | 147.1 | 0.1    | 1.7 | 1.6  | 9.940  | -55.55 | -237.80 | 0.0024 | -29.41 | 471.7 | 193.5 |          | -10.00 |
| L3 | 8/30/2016  | 97.7  | 1.58 | 0.1 | 156.7 | b.d.l. | 2.2 | 1.6  | 11.226 | -55.64 | -238.51 | 0.0030 | -29.73 | 463.6 | 194.0 |          | -10.04 |

|    |            |       |      |      |       |        |     |      |        |        |         |        |        |       |       |          |
|----|------------|-------|------|------|-------|--------|-----|------|--------|--------|---------|--------|--------|-------|-------|----------|
| L3 | 10/2/2016  | 83.8  | 1.75 | 0.1  | 139.5 | b.d.l. | 1.4 | 1.4  | 7.482  | -56.06 | -240.09 | 0.0021 | -29.44 | 372.4 | 190.1 | -9.38    |
| L3 | 11/8/2016  | 91.6  | 2.01 | 0.1  | 174.5 | b.d.l. | 2.1 | 1.8  | 11.776 | -56.07 | -242.74 | 0.0031 | -29.47 | 522.5 | 215.4 | -9.95    |
| L3 | 12/13/2016 | 122.1 | 2.23 | 0.1  | 163.4 | b.d.l. | 2.1 | 1.6  | 12.206 | -56.01 | -242.99 | 0.0031 | -29.24 | 518.2 | 230.4 | -9.90    |
| L3 | 1/17/2017  | 107.1 | 1.83 | 0.1  | 158.5 | b.d.l. | 1.7 | 1.6  | 12.556 | -56.09 | -241.40 | 0.0030 | -29.48 | 452.6 | 234.1 | -10.21   |
| L3 | 3/1/2017   | 94.0  | 1.65 | 0.1  | 166.8 | 0.1    | 1.9 | 1.6  | 10.653 | -56.79 | -226.79 | 0.0027 | -29.37 | 476.8 | 213.7 | -10.35   |
| L3 | 4/12/2017  | 114.8 | 1.97 | 0.1  | 165.7 | 0.1    | 2.0 | 1.5  | 12.058 | -56.02 | -229.22 | 0.0033 | -29.77 | 541.1 | 238.9 | -9.93    |
| L3 | 5/25/2017  | 115.0 | 1.54 | 0.1  | 167.5 | 0.1    | 2.1 | 1.4  | 11.188 | -56.82 | -231.78 | 0.0030 | -29.40 | 449.8 | 175.9 | -10.42   |
| L4 | 2/11/2015  | 8.5   | 0.09 | 8.8  | 31.4  | 7.5    | 2.7 | 26.7 | 0.088  | -52.37 | -142.44 |        |        | 26.9  | 628.8 |          |
| L4 | 2/22/2015  | 8.6   | 0.10 | 8.8  | 34.4  | 7.1    | 3.0 | 25.6 | 0.087  | -53.61 | -146.10 |        |        | 38.4  | 718.2 |          |
| L4 | 4/11/2015  | 8.2   | 0.10 | 8.9  | 32.4  | 7.7    | 3.0 | 27.2 | 0.112  | -50.17 |         |        |        | 33.4  | 730.7 |          |
| L4 | 5/24/2015  | 8.2   | 0.10 | 8.2  | 28.4  | 7.6    | 1.9 | 26.1 | 0.089  | -54.22 | -152.87 | b.d.l. |        | 31.3  | 802.8 |          |
| L4 | 6/19/2015  | 4.6   | 0.09 | 8.4  | 31.7  | 7.5    | 3.0 | 26.5 | 0.286  | -54.53 | -165.55 | b.d.l. |        | 30.4  | 760.7 | 0.713776 |
| L4 | 7/14/2015  | 8.7   | 0.10 | 8.0  | 32.5  | 6.5    | 2.8 | 23.4 | 0.439  | -54.04 | -163.68 | b.d.l. |        | 32.0  | 736.8 |          |
| L4 | 8/11/2015  | 9.5   | 0.09 | 8.2  | 33.1  | 7.0    | 2.6 | 25.3 | 0.109  | -53.55 | -158.07 | b.d.l. |        | 22.5  | 653.9 |          |
| L4 | 9/16/2015  | 9.0   | 0.09 | 8.3  | 26.6  | 5.9    | 2.4 | 21.7 | 0.062  | -48.64 | -187.68 | b.d.l. |        | 29.6  | 759.9 |          |
| L4 | 10/22/2015 | 4.5   | 0.10 | 8.4  | 31.6  | 6.9    | 1.7 | 25.9 | 0.118  | -53.93 | -141.13 | b.d.l. |        | 22.2  | 706.6 |          |
| L4 | 1/8/2016   | 8.1   | 0.11 | 8.6  | 28.9  | 6.8    | 1.4 | 23.5 | 0.326  | -53.94 | -167.20 | b.d.l. |        | 22.3  | 736.3 |          |
| L4 | 2/9/2016   | 8.7   | 0.11 | 11.1 | 28.8  | 7.2    | 1.8 | 25.1 | 0.386  | -53.37 | -172.66 | b.d.l. |        | 25.3  | 625.6 |          |
| L4 | 3/22/2016  | 7.6   | 0.10 | 6.7  | 28.1  | 7.8    | 1.8 | 26.1 | 0.328  | -53.92 | -166.53 | b.d.l. |        | 26.5  | 724.2 |          |
| L4 | 4/28/2016  | 8.9   | 0.11 | 6.9  | 27.9  | 7.6    | 1.4 | 25.7 | 0.441  | -52.79 | -162.88 | b.d.l. |        | 36.3  | 682.3 |          |
| L4 | 6/7/2016   | 8.9   | 0.10 | 6.8  | 28.9  | 7.5    | 2.0 | 25.7 | 0.515  | -53.88 | -206.95 | 0.0004 |        | 41.0  | 735.6 | 0.713763 |
| L4 | 7/21/2016  | 9.2   | 0.16 | 7.1  | 27.4  | 6.8    | 1.5 | 22.7 | 0.350  | -52.69 | -157.05 | 0.0004 |        | 42.7  | 678.0 | -17.64   |
| L4 | 8/30/2016  | 7.1   | 0.16 | 8.6  | 26.5  | 7.2    | 1.7 | 24.2 | 0.399  | -53.61 | -170.07 | 0.0004 |        | 36.0  | 663.0 | -17.60   |
| L4 | 10/2/2016  | 6.2   | 0.06 | 8.5  | 27.0  | 7.3    | 1.6 | 24.4 | 0.311  | -52.59 | -164.39 | 0.0004 |        | 32.9  | 627.1 | -17.16   |
| L4 | 11/8/2016  | 6.5   | 0.15 | 6.9  | 28.6  | 7.4    | 1.6 | 24.7 | 0.394  | -53.36 | -158.48 | 0.0004 |        | 42.0  | 694.5 | -17.55   |
| L4 | 12/13/2016 | 9.5   | 0.13 | 8.9  | 24.0  | 6.6    | 1.6 | 22.6 | 0.396  | -53.60 | -158.31 | 0.0004 |        | 41.9  | 812.0 | -17.56   |
| L4 | 1/17/2017  | 9.4   | 0.12 | 7.3  | 27.7  | 7.0    | 1.4 | 23.4 | 0.171  | -52.77 | -158.49 | 0.0004 |        | 38.6  | 781.0 | -17.72   |
| L4 | 3/1/2017   | 9.6   | 0.11 | 7.3  | 28.7  | 7.2    | 1.5 | 24.2 | 0.171  | -51.66 | -139.35 | 0.0004 |        | 46.9  | 728.0 | -17.76   |
| L4 | 4/12/2017  | 9.8   | 0.11 | 7.9  | 28.6  | 7.0    | 1.4 | 23.2 | 0.194  | -52.01 | -151.63 | b.d.l. |        | 44.1  | 667.9 | -17.88   |
| L4 | 5/25/2017  | 8.7   | 0.11 | 7.5  | 29.0  | 6.9    | 1.6 | 23.2 | 0.204  | -52.23 | -152.55 | b.d.l. |        | 45.6  | 625.0 | -17.88   |
| O1 | 5/9/2015   | 2.6   | 0.01 | 0.3  | 47.4  | 2.7    | 1.2 | 9.0  | 6.064  | -46.04 | -215.53 | 0.0016 |        | 115.5 | 308.1 |          |
| O1 | 6/3/2015   | 1.8   | 0.01 | 1.3  | 50.4  | 2.4    | 1.9 | 8.1  | 3.967  | -46.88 | -216.06 | 0.0011 |        | 114.5 | 275.4 |          |
| O1 | 7/1/2015   | 1.9   | 0.02 | 1.9  | 49.8  | 2.0    | 1.5 | 7.0  | 5.098  | -47.04 | -217.68 | 0.0021 |        | 80.3  | 267.0 |          |
| O1 | 8/13/2015  | 2.0   | 0.05 | 3.0  | 52.3  | 2.1    | 1.6 | 7.1  | 4.688  | -47.33 | -215.40 | 0.0023 |        | 78.5  | 238.0 |          |

|    |            |        |        |        |      |     |     |      |       |        |         |        |        |       |       |          |        |
|----|------------|--------|--------|--------|------|-----|-----|------|-------|--------|---------|--------|--------|-------|-------|----------|--------|
| O1 | 9/17/2015  | 1.6    | 0.02   | 1.9    | 48.6 | 2.0 | 1.5 | 7.4  | 1.419 | -48.05 | -212.39 | 0.0007 |        | 82.5  | 237.6 |          |        |
| O1 | 10/23/2015 | 1.7    | 0.06   | 3.4    | 48.6 | 2.1 | 0.6 | 7.4  | 3.441 | -48.10 | -209.49 | 0.0017 |        | 81.7  | 259.7 |          |        |
| O1 | 11/18/2015 | 1.3    | 0.01   | 1.5    | 47.4 | 2.3 | 1.2 | 7.6  | 3.859 | -48.35 | -207.54 | 0.0018 |        | 79.1  | 256.5 |          |        |
| O1 | 1/27/2016  | 1.7    | 0.02   | 1.9    | 46.1 | 2.3 | 1.6 | 7.6  | 3.188 | -48.53 | -212.02 | 0.0018 |        | 79.8  | 302.3 |          |        |
| O1 | 2/23/2016  | 1.9    | 0.01   | 1.5    | 49.6 | 2.5 | 1.8 | 8.0  | 2.602 | -48.55 | -212.05 | 0.0017 |        | 77.1  | 269.7 |          |        |
| O1 | 3/22/2016  | 1.3    | 0.01   | 1.7    | 49.0 | 2.6 | 1.5 | 8.4  | 2.582 | -48.32 | -213.51 | 0.0016 |        | 82.1  | 275.0 |          |        |
| O1 | 4/28/2016  | 1.6    | 0.01   | 3.6    | 49.1 | 2.6 | 1.3 | 8.2  | 3.260 | -47.23 | -212.53 | 0.0018 |        | 102.7 | 294.0 |          |        |
| O1 | 6/6/2016   | 1.7    | b.d.l. | 3.6    | 50.7 | 2.6 | 1.7 | 8.5  | 2.648 | -48.13 | -214.48 | 0.0015 | -40.12 | 105.2 | 314.0 | 0.713242 |        |
| O1 | 7/18/2016  | b.d.l. | 2.90   | 3.8    | 47.4 | 2.5 | 1.3 | 7.6  | 2.160 | -46.68 | -227.50 | 0.0015 | -32.54 | 104.0 | 281.4 |          | -16.63 |
| O1 | 8/29/2016  | 1.5    | 0.04   | 1.7    | 48.5 | 2.6 | 1.5 | 8.1  | 2.413 | -46.71 | -227.39 | 0.0015 |        | 105.5 | 301.0 |          | -16.25 |
| O1 | 10/6/2016  | 1.9    | b.d.l. | b.d.l. | 44.7 | 2.4 | 1.0 | 7.6  | 3.613 | -47.84 | -218.76 | 0.0021 | -32.92 | 100.6 | 284.2 |          | -16.49 |
| O1 | 11/9/2016  | 1.3    | 0.02   | 1.6    | 48.6 | 2.6 | 1.4 | 8.2  | 3.432 | -48.65 | -228.30 | 0.0020 | -32.89 | 113.1 | 314.4 |          | -16.72 |
| O1 | 1/16/2017  | 2.0    | 0.03   | 2.5    | 46.0 | 2.5 | 1.3 | 7.9  | 3.183 | -46.66 | -227.80 | 0.0018 | -32.75 | 101.7 | 346.8 |          | -16.65 |
| O1 | 2/27/2017  | 2.1    | 0.03   | 2.7    | 46.0 | 2.7 | 1.1 | 8.2  | 3.100 | -47.28 | -217.79 | 0.0017 | -32.73 | 113.1 | 351.0 |          | -16.73 |
| O1 | 4/11/2017  | 2.2    | 0.03   | 3.7    | 47.0 | 2.9 | 1.3 | 8.5  | 2.073 | -48.09 | -211.33 | 0.0014 | -32.67 | 91.1  | 280.9 |          | -16.33 |
| O1 | 5/24/2017  | 2.0    | 0.02   | 3.3    | 45.1 | 2.7 | 1.4 | 8.3  | 2.704 | -46.69 | -208.22 | 0.0016 | -32.55 | 96.0  | 288.8 |          | -16.81 |
| O2 | 5/9/2015   | 2.8    | 0.01   | 5.3    | 16.9 | 7.4 | 1.6 | 24.9 | 0.383 | -43.11 | -171.54 | b.d.l. |        | 34.2  | 454.7 |          |        |
| O2 | 6/3/2015   | 1.7    | 0.05   | 4.4    | 25.0 | 6.5 | 2.0 | 22.2 | 1.318 | -45.20 | -205.55 | b.d.l. |        | 52.2  | 385.0 |          |        |
| O2 | 7/1/2015   |        |        |        | 33.8 | 5.6 | 2.0 | 19.2 | 2.699 | -46.50 | -208.48 | 0.0010 |        | 64.1  | 421.4 |          |        |
| O2 | 8/13/2015  | 2.1    | 0.03   | 3.6    | 36.8 | 5.0 | 1.7 | 17.3 | 2.951 | -47.59 | -209.58 | 0.0012 |        | 69.4  | 356.3 |          |        |
| O2 | 9/17/2015  | 1.7    | 0.01   | 3.7    | 33.5 | 4.8 | 1.3 | 16.4 | 1.942 | -47.65 | -207.81 | 0.0005 |        | 66.1  | 374.8 |          |        |
| O2 | 10/23/2015 | 1.7    | b.d.l. | 4.4    | 31.3 | 5.1 | 0.6 | 17.6 | 2.477 | -47.92 | -208.47 | 0.0009 |        | 54.8  | 435.3 |          |        |
| O2 | 11/18/2015 | 1.3    | b.d.l. | 2.6    | 28.5 | 5.7 | 1.2 | 19.1 | 2.156 | -47.35 | -206.30 | b.d.l. |        | 52.3  | 438.6 |          |        |
| O2 | 1/27/2016  | 1.8    | 0.02   | 3.6    | 33.5 | 5.4 | 1.0 | 17.6 | 3.239 | -48.14 | -212.89 | 0.0013 |        | 59.7  | 413.9 |          |        |
| O2 | 2/23/2016  | 1.6    | 0.04   | 4.0    | 30.9 | 5.6 | 1.0 | 17.3 | 2.559 | -48.26 | -214.44 | 0.0010 |        | 50.5  | 393.8 |          |        |
| O2 | 3/22/2016  | 1.3    | 0.01   | 3.7    | 32.9 | 5.5 | 1.3 | 17.5 | 2.223 | -48.02 | -213.17 | 0.0010 |        | 57.0  | 374.7 |          |        |
| O2 | 4/28/2016  | 1.6    | 0.01   | 4.5    | 33.5 | 5.4 | 1.1 | 17.3 | 3.251 | -46.68 | -211.46 | 0.0011 |        | 71.1  | 387.4 |          |        |
| O2 | 6/6/2016   | 1.9    | 0.01   | 4.9    | 24.3 | 6.9 | 1.6 | 21.5 | 1.234 | -46.80 | -202.61 | 0.0005 |        | 54.1  | 536.1 | 0.713223 |        |
| O2 | 7/18/2016  | b.d.l. | 1.04   | 5.7    | 22.4 | 6.4 | 1.1 | 20.1 | 1.095 | -45.90 | -214.88 | 0.0004 |        | 50.6  | 473.4 |          | -17.08 |
| O2 | 8/29/2016  | 1.7    | 0.39   | 5.2    | 20.3 | 6.8 | 1.3 | 21.4 | 0.903 | -45.62 | -209.73 | 0.0005 |        | 47.4  | 497.9 |          | -16.87 |
| O2 | 10/6/2016  | 2.1    | b.d.l. | 5.4    | 23.4 | 6.3 | 1.0 | 19.7 | 1.881 | -46.24 | -211.43 | 0.0004 |        | 59.4  | 429.9 |          | -16.93 |
| O2 | 11/9/2016  | 1.6    | 0.68   | 5.1    | 22.8 | 6.8 | 1.3 | 21.4 | 1.535 | -46.84 | -210.64 | 0.0004 |        | 53.2  | 546.0 |          | -17.32 |
| O2 | 1/16/2017  | 2.1    | 0.02   | 5.0    | 17.2 | 6.8 | 1.1 | 21.2 | 0.525 | -45.01 | -194.33 | 0.0004 |        | 40.0  | 596.0 |          | -17.28 |
| O2 | 2/27/2017  | 2.1    | 0.01   | 5.4    | 13.8 | 7.7 | 1.2 | 23.8 | 0.120 | -38.35 | -92.65  | 0.0004 |        | 39.5  | 611.4 |          | -17.31 |

|    |            |        |        |      |      |      |        |      |       |        |         |        |      |       |          |
|----|------------|--------|--------|------|------|------|--------|------|-------|--------|---------|--------|------|-------|----------|
| O2 | 4/11/2017  | 2.4    | 0.02   | 7.0  | 14.6 | 7.9  | 1.2    | 24.5 | 0.088 | -38.72 | -88.07  | b.d.l. | 33.1 | 625.4 | -16.93   |
| O2 | 5/24/2017  | 2.1    | 0.02   | 6.2  | 15.1 | 7.4  | 1.1    | 22.8 | 0.327 | -45.26 | -177.71 | b.d.l. | 41.9 | 497.5 | -17.45   |
| O3 | 5/9/2015   | 2.8    | 0.03   | 5.1  | 17.7 | 7.2  | 1.5    | 24.1 | 0.609 | -44.97 | -188.79 | b.d.l. | 35.9 | 450.0 |          |
| O3 | 6/3/2015   | 2.1    | 0.03   | 4.9  | 24.6 | 7.7  | 1.5    | 24.8 | 0.811 | -45.41 | -197.38 | b.d.l. | 44.5 | 422.9 |          |
| O3 | 7/1/2015   | 2.1    | 0.01   | 4.6  | 23.9 | 6.6  | 1.8    | 22.3 | 1.428 | -46.01 | -199.19 | b.d.l. | 46.1 | 455.0 |          |
| O3 | 8/13/2015  | 1.9    | 0.02   | 4.1  | 29.1 | 6.0  | 1.6    | 20.6 | 1.585 | -45.50 | -202.66 | 0.0004 | 51.4 | 424.0 |          |
| O3 | 9/17/2015  | 1.9    | 0.01   | 4.3  | 25.7 | 5.7  | 1.5    | 19.7 | 1.148 | -47.01 | -203.78 | 0.0004 | 53.9 | 410.9 |          |
| O3 | 10/23/2015 | 1.8    | 0.01   | 5.0  | 23.4 | 5.9  | b.d.l. | 20.5 | 1.400 | -47.40 | -199.11 | b.d.l. | 42.9 | 451.5 |          |
| O3 | 11/18/2015 | 1.2    | b.d.l. | 2.1  | 24.7 | 6.3  | 1.5    | 21.2 | 1.423 | -47.31 | -199.03 | b.d.l. | 43.0 | 461.2 |          |
| O3 | 1/27/2016  | 1.8    | 0.04   | 4.8  | 30.5 | 5.7  | 1.0    | 19.1 | 2.524 | -47.95 | -212.26 | 0.0011 | 51.7 | 416.5 |          |
| O3 | 2/23/2016  | 1.6    | 0.02   | 3.3  | 28.1 | 5.6  | 1.2    | 18.6 | 2.074 | -47.84 | -213.99 | 0.0010 | 45.4 | 398.6 |          |
| O3 | 3/23/2016  | 1.3    | 0.01   | 3.9  | 31.7 | 5.7  | 1.3    | 18.2 | 2.327 | -47.90 | -211.15 | 0.0010 | 52.8 | 370.2 |          |
| O3 | 4/28/2016  | 1.6    | 0.01   | 4.7  | 27.9 | 6.2  | 1.1    | 19.6 | 2.218 | -46.69 | -207.09 | 0.0009 | 58.5 | 419.4 |          |
| O3 | 6/6/2016   | 1.9    | 0.02   | 4.9  | 22.8 | 7.1  | 1.7    | 22.6 | 1.146 | -46.80 | -198.31 | 0.0004 | 52.2 | 497.6 | 0.713232 |
| O3 | 7/18/2016  | b.d.l. | 2.16   | 5.7  | 22.1 | 6.4  | 1.1    | 20.0 | 0.896 | -45.45 | -209.01 | 0.0004 | 49.9 | 465.8 | -17.22   |
| O3 | 8/29/2016  | 1.9    | 0.17   | 6.6  | 20.8 | 6.7  | 1.3    | 20.9 | 0.832 | -45.14 | -204.50 | 0.0004 | 51.0 | 491.6 | -17.03   |
| O3 | 10/6/2016  | 1.5    | b.d.l. | 0.8  | 21.9 | 5.9  | 1.0    | 18.7 | 1.556 | -45.34 | -202.49 | 0.0008 | 55.8 | 407.7 | -17.14   |
| O3 | 11/9/2016  | 1.1    | 0.03   | 3.2  | 23.2 | 6.6  | 1.2    | 21.0 | 1.218 | -45.14 | -207.68 | 0.0004 | 53.0 | 466.4 | -17.68   |
| O3 | 1/16/2017  | 2.1    | 0.02   | 5.1  | 17.4 | 6.5  | 0.9    | 20.3 | 0.527 | -44.30 | -189.54 | 0.0004 | 38.7 | 553.9 | -17.46   |
| O3 | 2/27/2017  | 2.4    | 0.02   | 6.2  | 17.1 | 7.1  | 1.1    | 22.1 | 0.394 | -44.54 | -171.48 | 0.0004 | 43.2 | 499.7 | -17.46   |
| O3 | 4/11/2017  | 2.2    | 0.02   | 6.7  | 17.5 | 7.4  | 1.1    | 23.0 | 0.238 | -42.58 | -147.28 | b.d.l. | 38.2 | 568.8 | -17.08   |
| O3 | 5/24/2017  | 2.0    | 0.02   | 5.9  | 17.0 | 7.1  | 1.2    | 21.8 | 0.367 | -44.88 | -168.33 | b.d.l. | 41.2 | 478.5 | -17.53   |
| O4 | 5/9/2015   | 2.8    | 0.01   | 9.2  | 10.5 | 8.5  | 1.6    | 29.6 | 0.100 | -39.99 | -160.93 | 0.0028 | 15.9 | 314.8 |          |
| O4 | 6/3/2015   | 1.7    | b.d.l. | 9.3  | 8.6  | 9.1  | 1.1    | 27.0 | 0.063 | -41.13 | -138.00 | 0.0018 | 15.4 | 319.3 |          |
| O4 | 7/1/2015   | 1.8    | 0.01   | 9.0  | 11.7 | 8.8  | 1.6    | 28.9 | 0.082 | -40.48 | -134.29 | 0.0021 | 10.2 | 330.5 |          |
| O4 | 8/13/2015  | 1.8    | 0.02   | 7.9  | 11.9 | 9.0  | 1.5    | 30.0 | 0.134 | -40.01 | -155.26 | 0.0010 | 11.8 | 291.6 |          |
| O4 | 9/17/2015  | 1.5    | 0.01   | 8.2  | 8.8  | 8.8  | 1.8    | 28.6 | 0.058 | -41.91 | -193.29 | b.d.l. | 12.6 | 321.7 |          |
| O4 | 10/23/2015 | 1.4    | b.d.l. | 8.6  | 11.0 | 8.5  | b.d.l. | 29.3 | 0.149 | -45.81 | -233.01 | 0.0007 | 11.4 | 315.0 |          |
| O4 | 11/18/2015 | 1.2    | b.d.l. | 8.5  | 14.1 | 7.9  | 2.4    | 26.1 | 0.168 | -46.54 | -246.14 | b.d.l. | 10.2 | 267.9 |          |
| O4 | 1/27/2016  | 1.4    | 0.02   | 9.1  | 10.9 | 9.4  | 1.0    | 30.9 | 0.242 | -48.19 | -275.54 | 0.0005 | 13.9 | 297.1 |          |
| O4 | 2/23/2016  | 1.5    | 0.01   | 12.3 | 8.4  | 9.2  | 0.8    | 28.1 | 0.201 | -48.80 | -267.82 | 0.0004 | 12.5 | 300.1 |          |
| O4 | 3/22/2016  | 1.0    | 0.01   | 5.7  | 8.6  | 9.4  | 1.0    | 29.5 | 0.190 | -49.46 | -274.65 | b.d.l. | 13.6 | 312.0 |          |
| O4 | 4/28/2016  | 1.3    | 0.01   | 8.0  | 8.4  | 9.4  | 0.9    | 29.3 | 0.213 | -49.43 | -282.26 | b.d.l. | 15.8 | 322.8 |          |
| O4 | 6/6/2016   | 1.4    | 0.01   | 7.8  | 8.9  | 10.1 | 1.7    | 31.9 | 0.170 | -49.94 | -281.82 | 0.0004 | 14.6 | 337.2 | 0.713458 |



|    |            |        |      |      |      |     |     |      |        |        |         |        |      |        |          |
|----|------------|--------|------|------|------|-----|-----|------|--------|--------|---------|--------|------|--------|----------|
| O4 | 7/18/2016  | b.d.l. | 2.44 | 9.6  | 7.5  | 9.2 | 1.1 | 29.0 | 0.112  | -52.51 | -289.43 | 0.0004 | 13.6 | 312.5  | -17.13   |
| O4 | 8/29/2016  | 1.2    | 0.05 | 9.5  | 7.4  | 8.6 | 1.2 | 27.4 | 0.112  | -53.07 | -288.99 | 0.0004 | 16.6 | 311.9  | -16.80   |
| O4 | 10/6/2016  | 1.5    | 0.02 | 9.7  | 6.9  | 8.3 | 0.8 | 26.6 | 0.171  | -55.65 | -306.70 | 0.0004 | 9.0  | 291.7  | -16.89   |
| O4 | 11/9/2016  | 1.0    | 0.04 | 6.8  | 8.6  | 9.1 | 1.0 | 28.9 | 0.162  | -57.35 | -335.06 | 0.0004 | 15.5 | 312.8  | -17.50   |
| O4 | 1/16/2017  | 1.6    | 0.02 | 8.1  | 7.7  | 8.5 | 0.9 | 26.7 | 0.129  | -56.41 | -307.39 | 0.0004 | 13.8 | 352.0  | -16.98   |
| O4 | 2/27/2017  | 1.6    | 0.03 | 7.7  | 8.1  | 8.9 | 0.9 | 28.0 | 0.125  | -59.51 | -324.06 | 0.0004 | 14.9 | 326.4  | -16.97   |
| O4 | 4/11/2017  | 1.8    |      | 10.1 | 8.6  | 9.2 | 1.0 | 28.9 | 0.091  | -57.49 | -292.07 | b.d.l. | 14.8 | 349.9  | -16.79   |
| O4 | 5/24/2017  | 1.6    | 0.03 | 9.5  | 7.2  | 8.8 | 1.0 | 27.3 | 0.093  | -57.56 | -276.02 | b.d.l. | 15.4 | 257.7  | -17.18   |
| R1 | 1/15/2015  | 4.5    | 0.01 | 5.6  | 26.9 | 2.6 | 1.9 | 15.1 | 0.044  | -55.31 | -195.51 |        | 42.4 | 778.0  |          |
| R1 | 2/12/2015  | 4.4    | 0.01 | 5.0  | 29.3 | 1.9 | 2.0 | 11.7 | 0.116  | -52.53 |         |        | 49.5 | 730.2  |          |
| R1 | 4/12/2015  | 4.5    | 0.03 | 6.6  | 22.9 | 4.1 | 2.4 | 19.4 | 0.018  | -53.73 | -127.22 |        | 41.0 | 1016.9 |          |
| R1 | 5/10/2015  | 4.6    | 0.02 | 6.9  | 14.7 | 4.1 | 1.2 | 19.2 | 0.121  | -45.67 | -209.05 | b.d.l. | 31.5 | 1147.9 |          |
| R1 | 6/5/2015   | 4.0    | 0.02 | 8.1  | 11.2 | 5.3 | 1.0 | 21.7 | 0.010  |        |         | b.d.l. | 26.0 | 722.5  | 0.713251 |
| R1 | 6/30/2015  | 6.1    | 0.02 | 8.3  | 13.7 | 4.9 | 1.7 | 23.0 | 0.037  | -56.43 | -196.31 | b.d.l. | 23.5 | 542.8  |          |
| R1 | 7/27/2015  | 5.6    | 0.02 | 8.4  | 10.7 | 4.7 | 1.2 | 22.5 | 0.009  |        |         | b.d.l. | 21.5 | 519.4  |          |
| R1 | 8/12/2015  | 6.4    | 0.02 | 8.6  | 12.3 | 4.5 | 1.5 | 21.5 | 0.008  |        |         | b.d.l. | 19.4 | 522.3  |          |
| R1 | 9/14/2015  | 5.8    | 0.01 | 8.5  | 10.1 | 5.0 | 1.0 | 23.1 | 0.006  |        |         | b.d.l. | 19.6 | 570.1  |          |
| R1 | 10/21/2015 | 6.1    | 0.01 | 8.5  | 8.6  | 4.9 | 1.0 | 20.4 | 0.058  | -57.51 | -170.65 | b.d.l. | 21.0 | 563.4  |          |
| R1 | 1/7/2016   | 4.9    | 0.02 | 10.2 | 15.3 | 4.4 | 1.1 | 18.8 | 0.006  |        |         | b.d.l. | 21.0 | 521.2  |          |
| R1 | 2/8/2016   | 5.7    | 0.02 | 10.8 | 16.0 | 4.5 | 1.3 | 20.1 | 0.013  | -54.09 | -128.36 | 0.0004 | 24.9 | 525.0  |          |
| R1 | 3/25/2016  | 5.5    | 0.02 | 7.0  | 20.3 | 4.2 | 1.6 | 18.8 | 0.007  |        |         | 0.0004 | 31.0 | 533.3  |          |
| R1 | 4/26/2016  | 4.7    | 0.01 | 4.6  | 32.5 | 2.5 | 1.5 | 12.7 | 0.050  | -62.55 | -158.93 | 0.0004 | 67.3 | 652.6  |          |
| R1 | 6/6/2016   | 4.7    | 0.01 | 4.8  | 34.9 | 2.4 | 2.0 | 12.7 | 0.048  | -67.02 | -161.92 | 0.0004 | 82.1 | 797.2  | 0.713305 |
| R1 | 7/18/2016  | 4.6    | 0.01 | 4.6  | 33.1 | 2.1 | 1.7 | 11.1 | 0.057  | -67.46 | -165.83 | 0.0004 | 82.5 | 709.7  | -17.43   |
| R1 | 8/29/2016  | 4.1    | 0.02 | 4.0  | 33.7 | 2.2 | 1.8 | 11.7 | 0.086  | -66.97 | -157.64 | 0.0004 | 76.2 | 729.2  | -17.19   |
| R1 | 10/4/2016  | 1.7    | 0.04 | 5.5  | 31.4 | 2.6 | 1.7 | 13.4 | 0.070  | -65.97 | -167.46 | b.d.l. | 61.4 | 691.0  | -17.15   |
| R1 | 11/6/2016  | 3.4    | 0.04 | 3.0  | 31.7 | 2.6 | 1.8 | 13.6 | 0.047  | -54.47 | -154.98 | 0.0004 | 75.7 | 809.5  | -17.55   |
| R1 | 12/13/2016 | 9.1    | 0.04 | 5.6  | 26.6 | 2.4 | 1.8 | 12.7 | 0.074  | -62.64 | -176.96 | 0.0004 | 73.5 | 939.7  | -17.60   |
| R1 | 1/17/2017  | 5.2    | 0.02 | 3.8  | 27.7 | 2.6 | 1.5 | 12.8 | 0.052  | -62.46 | -162.97 | 0.0004 | 67.3 | 1041.9 | -17.51   |
| R1 | 2/27/2017  | 5.6    | 0.04 | 4.3  | 29.4 | 2.9 | 1.8 | 14.1 | 0.054  | -60.56 | -177.22 | 0.0004 | 75.8 | 993.2  | -17.69   |
| R1 | 4/11/2017  | 6.2    | 0.02 | 5.8  | 26.2 | 3.0 | 1.9 | 14.9 | 0.050  | -60.48 | -179.14 | 0.0004 | 60.8 | 1077.3 | -17.34   |
| R1 | 5/24/2017  | 5.4    | 0.01 | 5.8  | 24.0 | 3.2 | 1.9 | 15.5 | 0.041  | -59.32 |         | b.d.l. | 56.4 | 829.4  | -17.78   |
| R2 | 1/14/2015  | 4.9    | 0.04 | 8.6  | 9.2  | 5.3 | 1.2 | 25.3 | b.d.l. | -51.66 |         |        | 16.1 | 693.6  |          |
| R2 | 2/12/2015  | 4.9    | 0.03 | 8.8  | 8.8  | 5.5 | 1.0 | 25.5 | 0.002  |        |         |        | 31.7 | 678.5  |          |

|    |            |      |        |      |     |     |     |      |        |        |         |        |        |          |        |
|----|------------|------|--------|------|-----|-----|-----|------|--------|--------|---------|--------|--------|----------|--------|
| R2 | 3/4/2015   | 5.2  | 0.02   | 9.1  | 7.9 | 5.3 | 1.1 | 24.6 | 0.002  |        |         | 16.0   | 642.8  |          |        |
| R2 | 4/12/2015  | 5.1  | 0.01   | 8.9  | 8.1 | 6.1 | 1.4 | 25.9 | 0.002  |        |         | 18.0   | 681.4  |          |        |
| R2 | 5/10/2015  | 5.1  | 0.01   | 9.1  | 6.4 | 5.8 | 0.5 | 24.5 | 0.003  |        | b.d.l.  | 14.4   | 590.7  |          |        |
| R2 | 6/5/2015   | 4.3  | 0.02   | 9.1  | 5.7 | 5.8 | 1.4 | 24.0 | 0.003  |        | b.d.l.  | 16.3   | 568.4  | 0.713104 |        |
| R2 | 6/30/2015  | 6.2  | 0.01   | 9.1  | 9.0 | 5.5 | 1.5 | 25.0 | 0.002  |        | b.d.l.  | 16.1   | 501.1  |          |        |
| R2 | 7/27/2015  | 5.8  | 0.01   | 9.1  | 6.3 | 5.3 | 0.7 | 24.2 | 0.003  |        | b.d.l.  | 13.3   | 511.1  |          |        |
| R2 | 8/12/2015  | 6.5  | 0.03   | 9.2  | 7.9 | 5.0 | 1.3 | 22.4 | 0.002  |        | b.d.l.  | 12.3   | 480.9  |          |        |
| R2 | 9/14/2015  | 6.0  | 0.02   | 9.1  | 5.9 | 5.7 | 1.1 | 25.3 | 0.002  |        | b.d.l.  | 11.9   | 493.5  |          |        |
| R2 | 10/21/2015 | 6.3  | 0.01   | 9.3  | 4.5 | 5.6 | 1.0 | 23.8 | 0.002  |        | b.d.l.  | 14.5   | 540.1  |          |        |
| R2 | 1/7/2016   | 5.5  | 0.04   | 11.8 | 8.5 | 5.4 | 0.9 | 22.0 | 0.002  |        | b.d.l.  | 10.1   | 507.2  |          |        |
| R2 | 2/8/2016   | 6.2  | 0.02   | 13.3 | 6.2 | 5.7 | 0.9 | 24.4 | 0.003  |        | 0.0004  | 14.7   | 444.9  |          |        |
| R2 | 3/25/2016  | 6.3  | 0.02   | 9.2  | 4.9 | 5.9 | 0.9 | 24.7 | 0.002  |        | 0.0004  | 10.9   | 404.4  |          |        |
| R2 | 4/26/2016  | 6.2  | 0.01   | 8.3  | 4.3 | 6.0 | 0.9 | 25.4 | 0.004  |        | 0.0004  | 14.5   | 491.3  |          |        |
| R2 | 6/6/2016   | 5.9  | 0.01   | 8.2  | 4.3 | 5.7 | 0.9 | 24.3 | 0.003  |        | 0.0004  | 15.5   | 578.0  | 0.713223 |        |
| R2 | 7/18/2016  | 6.1  | 0.03   | 9.2  | 7.0 | 5.9 | 1.3 | 25.1 | 0.010  |        | 0.0004  | 23.1   | 823.2  | -17.85   |        |
| R2 | 8/29/2016  | 5.8  | 0.02   | 14.0 | 6.4 | 6.2 | 1.5 | 26.6 | 0.016  | -55.95 | -152.71 | 0.0004 | 21.9   | 859.8    | -17.74 |
| R2 | 10/4/2016  | 2.6  | b.d.l. | 10.0 | 6.5 | 6.4 | 1.3 | 27.3 | 0.009  |        | b.d.l.  | 23.3   | 846.7  | -17.89   |        |
| R2 | 11/6/2016  | 4.1  | 0.02   | 8.5  | 7.0 | 6.4 | 1.4 | 27.3 | 0.003  |        | 0.0004  | 23.9   | 905.9  | -17.81   |        |
| R2 | 12/13/2016 | 10.1 | 0.03   | 9.9  | 4.5 | 6.0 | 1.5 | 26.2 | 0.017  | -46.38 | -214.10 | 0.0004 | 20.6   | 873.4    | -18.09 |
| R2 | 1/17/2017  | 6.2  | 0.02   | 7.1  | 6.5 | 6.1 | 1.4 | 25.4 | 0.004  |        | 0.0004  | 22.6   | 1068.2 | -18.08   |        |
| R2 | 2/27/2017  | 6.4  | 0.02   | 8.0  | 6.9 | 6.4 | 1.3 | 26.7 | 0.010  | -51.74 | -204.30 | 0.0004 | 26.6   | 1067.7   | -18.17 |
| R2 | 4/11/2017  | 7.3  | 0.02   | 10.3 | 6.2 | 6.3 | 1.3 | 26.3 | 0.010  |        | 0.0004  | 23.4   | 1120.3 | -17.42   |        |
| R2 | 5/24/2017  | 6.4  | 0.03   | 9.9  | 5.6 | 6.1 | 1.3 | 25.0 | 0.009  | -53.31 | -163.84 | b.d.l. | 22.4   | 748.5    | -18.11 |
| R3 | 1/29/2015  | 5.5  | 0.02   | 9.1  | 3.5 | 5.0 | 0.6 | 21.8 | b.d.l. |        |         | 5.6    | 53.8   |          |        |
| R3 | 2/12/2015  | 6.2  | 0.03   | 9.1  | 3.6 | 5.0 | 0.7 | 21.7 | 0.049  | -50.91 | -195.23 |        | 12.0   | 36.8     |        |
| R3 | 3/4/2015   | 6.2  | 0.02   | 9.2  | 3.5 | 5.0 | 0.6 | 21.2 | b.d.l. |        |         | 7.8    | 41.6   |          |        |
| R3 | 4/12/2015  | 6.0  | 0.02   | 8.1  | 1.0 | 5.0 | 0.5 | 19.8 | b.d.l. |        |         | 6.6    | 57.4   |          |        |
| R3 | 5/10/2015  | 5.3  | 0.02   | 9.4  | 3.0 | 5.4 | 0.5 | 21.6 | b.d.l. |        | b.d.l.  | 6.0    | 60.8   |          |        |
| R3 | 6/5/2015   | 4.4  | 0.05   | 9.4  | 0.9 | 5.3 | 0.3 | 20.2 | b.d.l. |        | b.d.l.  | 6.5    | 59.2   | 0.713477 |        |
| R3 | 7/1/2015   | 6.3  | 0.02   | 9.4  | 0.9 | 5.4 | 0.3 | 20.5 | b.d.l. |        | b.d.l.  | 6.2    | 59.5   |          |        |
| R3 | 7/28/2015  | 5.8  | 0.01   | 9.5  | 1.0 | 5.4 | 0.3 | 20.9 | 0.002  |        | b.d.l.  | 5.7    | 59.0   |          |        |
| R3 | 8/12/2015  | 6.6  | 0.02   | 9.4  | 1.3 | 4.9 | 0.6 | 19.7 | b.d.l. |        | b.d.l.  | 5.4    | 56.6   |          |        |
| R3 | 9/14/2015  | 6.0  | 0.02   | 9.3  | 0.7 | 4.9 | 0.5 | 19.6 | b.d.l. |        | b.d.l.  | 5.2    | 59.3   |          |        |
| R3 | 10/21/2015 | 6.3  | 0.01   | 9.4  | 0.6 | 4.9 | 0.5 | 19.5 | b.d.l. |        | b.d.l.  | 6.2    | 56.4   |          |        |

|    |            |      |        |      |        |     |     |      |        |        |         |        |      |          |          |
|----|------------|------|--------|------|--------|-----|-----|------|--------|--------|---------|--------|------|----------|----------|
| R3 | 1/7/2016   | 5.8  | 0.03   | 11.2 | 0.5    | 5.0 | 0.4 | 19.7 | b.d.l. |        | b.d.l.  | 5.6    | 60.6 |          |          |
| R3 | 2/8/2016   | 6.7  | 0.03   | 13.2 | 0.6    | 5.1 | 0.6 | 20.1 | 0.002  |        | 0.0004  | 5.9    | 56.8 |          |          |
| R3 | 3/25/2016  | 6.2  | 0.02   | 9.1  | 1.2    | 5.4 | 0.5 | 21.9 | b.d.l. |        | 0.0004  | 5.9    | 56.1 |          |          |
| R3 | 4/26/2016  | 6.3  | 0.02   | 7.7  | 0.5    | 5.0 | 0.3 | 20.0 | 0.002  |        | 0.0004  | 6.3    | 57.0 |          |          |
| R3 | 6/6/2016   | 6.2  | b.d.l. | 8.1  | 1.0    | 5.3 | 0.4 | 20.7 | b.d.l. |        | 0.0004  | 5.2    | 60.9 | 0.713265 |          |
| R3 | 7/18/2016  | 6.2  | b.d.l. | 9.0  | 0.4    | 5.1 | 0.4 | 20.0 | 0.013  | -54.58 | -220.29 | 0.0004 | 6.8  | 55.1     | -19.77   |
| R3 | 8/29/2016  | 4.6  | 0.04   | 9.9  | 0.9    | 5.3 | 0.4 | 20.6 | 0.009  |        |         | 0.0004 | 7.2  | 56.4     | -15.95   |
| R3 | 10/4/2016  | 7.6  | 0.02   | 9.2  | 1.0    | 5.4 | 0.4 | 21.0 | 0.004  |        |         | b.d.l. | 6.1  | 57.5     | -19.62   |
| R3 | 11/6/2016  | 6.4  | 0.03   | 8.7  | 1.4    | 5.4 | 0.6 | 22.0 | 0.002  |        |         | 0.0004 | 7.0  | 55.3     | -19.82   |
| R3 | 12/13/2016 | 11.7 | 0.07   | 9.2  | b.d.l. | 5.1 | 0.8 | 20.8 | 0.013  | -49.33 | -232.65 | 0.0004 | 6.5  | 64.4     | -19.95   |
| R3 | 1/17/2017  | 6.4  | 0.03   | 7.4  | 1.6    | 5.0 | 0.6 | 20.1 | 0.004  |        |         | 0.0004 | 7.0  | 64.9     | -19.89   |
| R3 | 2/27/2017  | 7.7  | 0.02   | 7.8  | 0.4    | 5.3 | 0.5 | 20.9 | 0.010  | -46.98 | -223.75 | 0.0004 | 9.1  | 64.0     | -19.91   |
| R3 | 4/11/2017  | 9.0  | 0.03   | 9.4  | 1.0    | 5.6 | 0.5 | 21.3 | 0.007  |        |         | 0.0004 | 6.0  | 69.5     | -19.49   |
| R3 | 5/24/2017  | 7.4  | 0.02   | 9.2  | 0.9    | 5.5 | 0.6 | 21.1 | 0.006  | -51.05 | -172.94 | b.d.l. | 7.2  | 57.1     | -19.91   |
| R4 | 1/14/2015  | 5.8  | 0.02   | 9.7  | 3.9    | 6.7 | 0.7 | 27.5 | b.d.l. | -32.78 |         |        | 7.5  | 75.2     |          |
| R4 | 3/4/2015   | 6.2  | 0.01   | 9.2  | 3.6    | 5.1 | 0.5 | 22.8 | b.d.l. |        |         |        | 6.9  | 64.2     |          |
| R4 | 4/12/2015  | 5.8  | 0.01   | 9.2  | 0.8    | 5.2 | 0.5 | 21.2 | b.d.l. |        |         |        | 7.0  | 64.2     |          |
| R4 | 5/10/2015  | 5.4  | 0.01   | 9.4  | 3.4    | 5.8 | 0.5 | 24.0 | 0.114  | -45.21 | -215.48 | b.d.l. | 6.8  | 72.1     |          |
| R4 | 6/5/2015   | 4.5  | 0.01   | 9.3  | 1.1    | 6.2 | 0.4 | 24.0 | b.d.l. |        |         | b.d.l. | 6.5  | 71.9     | 0.713453 |
| R4 | 7/1/2015   | 6.2  | 0.04   | 9.5  | 4.9    | 6.3 | 1.0 | 27.2 | b.d.l. |        |         | b.d.l. | 6.7  | 80.8     |          |
| R4 | 7/28/2015  | 5.5  | 0.02   | 8.9  | 4.1    | 6.3 | 0.7 | 28.0 | 0.003  |        |         | b.d.l. | 7.7  | 81.6     |          |
| R4 | 8/12/2015  | 6.5  | 0.04   | 9.1  | 1.2    | 5.7 | 0.6 | 22.9 | b.d.l. |        |         | b.d.l. | 6.2  | 72.3     |          |
| R4 | 9/14/2015  | 6.0  | 0.02   | 9.2  | 0.7    | 5.2 | 0.4 | 20.7 | b.d.l. |        |         | b.d.l. | 5.2  | 61.4     |          |
| R4 | 10/21/2015 | 6.3  | 0.02   | 9.3  | 0.6    | 5.1 | 0.5 | 20.5 | 0.002  |        |         | b.d.l. | 6.1  | 54.7     |          |
| R4 | 1/7/2016   | 5.9  | 0.04   | 11.4 | 0.8    | 5.4 | 0.5 | 21.3 | b.d.l. |        |         | b.d.l. | 5.2  | 64.8     |          |
| R4 | 2/8/2016   | 6.7  | 0.03   | 12.9 | 0.7    | 5.4 | 0.5 | 21.4 | 0.002  |        |         | 0.0004 | 6.0  | 61.8     |          |
| R4 | 3/25/2016  | 6.0  | 0.02   | 7.9  | 0.7    | 5.4 | 0.5 | 21.6 | b.d.l. |        |         | 0.0004 | 6.1  | 63.5     |          |
| R4 | 4/26/2016  | 6.3  | 0.01   | 8.3  | 0.4    | 5.1 | 0.5 | 20.3 | 0.002  |        |         | 0.0004 | 6.7  | 59.4     |          |
| R4 | 6/6/2016   | 6.0  | 0.02   | 8.1  | 0.9    | 5.4 | 0.3 | 21.0 | b.d.l. |        |         | 0.0004 | 5.2  | 65.6     | 0.713409 |
| R4 | 7/18/2016  | 6.3  | 0.02   | 9.1  | 0.3    | 5.1 | 0.4 | 20.2 | 0.003  |        |         | 0.0004 | 6.8  | 55.2     | -20.05   |
| R4 | 8/29/2016  | 4.7  | 0.03   | 9.4  | 1.0    | 5.4 | 0.4 | 21.0 | 0.007  |        |         | 0.0004 | 6.8  | 56.4     | -19.74   |
| R4 | 10/4/2016  | 3.8  | 0.03   | 9.3  | 1.0    | 5.6 | 0.4 | 21.1 | 0.003  |        |         | b.d.l. | 6.4  | 56.3     | -19.90   |
| R4 | 11/6/2016  | 7.5  | 0.05   | 10.8 | 1.5    | 5.4 | 0.6 | 21.9 | 0.002  |        |         | 0.0004 | 8.6  | 59.4     | -19.93   |
| R4 | 12/13/2016 | 11.7 | 0.10   | 9.2  | b.d.l. | 5.1 | 0.8 | 20.8 | 0.011  | -54.20 | -232.28 | 0.0004 | 6.9  | 63.3     | -20.09   |

|    |           |     |      |     |     |     |     |      |       |        |         |        |     |      |        |
|----|-----------|-----|------|-----|-----|-----|-----|------|-------|--------|---------|--------|-----|------|--------|
| R4 | 1/17/2017 | 7.0 | 0.02 | 8.3 | 1.5 | 5.0 | 0.5 | 20.5 | 0.061 | -42.21 | -218.65 | 0.0004 | 7.2 | 65.2 | -20.01 |
| R4 | 2/27/2017 | 7.7 | 0.03 | 8.0 | 1.1 | 5.7 | 0.5 | 21.9 | 0.012 | -46.59 | -217.17 | 0.0004 | 8.2 | 61.8 | -19.97 |
| R4 | 4/11/2017 | 9.1 | 0.03 | 9.5 | 1.0 | 5.6 | 0.6 | 21.6 | 0.006 |        |         | 0.0004 | 5.5 | 63.4 | -19.62 |
| R4 | 5/24/2017 | 7.4 | 0.02 | 9.2 | 1.0 | 5.6 | 0.4 | 21.4 | 0.006 | -53.28 | -212.34 | b.d.l. | 7.1 | 56.2 | -19.79 |

257

258 **References**

259

260 1. Woodrow DL (1985) Paleogeography, paleoclimate, and sedimentary processes of the Late Devonian Catskill Delta. *Geological Society of America Special*  
261 *Paper* 201:51-64.

262 2. Darrah TH, *et al.* (2015) The evolution of Devonian hydrocarbon gases in shallow aquifers of the northern Appalachian Basin: Insights from integrating  
263 noble gas and hydrocarbon geochemistry. *Geochim Cosmochim Acta* 170:321-355.

264 3. Taylor LE (1984) Groundwater Resources of the Upper Susquehanna River Basin, Pennsylvania. *Pennsylvania Geological Survey Fourth Series*.

265 4. McGhee GRJ, Sutton, R.G. (1985) Late Devonian marine ecosystems of the lower West Falls Group in New York. *Geological Society of America Special*  
266 *Paper* 201:199-210.

267 5. Baldassare FJ, McCaffrey MA, & Harper JA (2014) A geochemical context for stray gas investigations in the northern Appalachian Basin: Implications of  
268 analyses of natural gases from Neogene-through Devonian-age strata. *Aapg Bulletin* 98(2):341-372.

269 6. Jenden PD, Drazan, D.J., Kaplan, I.R. (1993) Mixing of thermogenic natural gases in the Northern Appalachian Basin. *AAPG Bulletin* 77:980-998.

270 7. Engelder T, Lash, G.G., Uzcategui (2009) Joint sets that enhance production from Middle and Upper Devonian gas shales of the Appalachian Basin. *AAPG*  
271 *Bulletin* 93:857-889.

272 8. Schoell M (1983) Genetic-Characterization of Natural Gases. *Aapg Bull* 67(12):2225-2238.

273 9. Warner NR, *et al.* (2012) Geochemical evidence for possible natural migration of Marcellus Formation brine to shallow aquifers in Pennsylvania. *P Natl*  
274 *Acad Sci USA* 109(30):11961-11966.

275 10. Llewellyn GT (2014) Evidence and mechanisms for Appalachian Basin brine migration into shallow aquifers in NE Pennsylvania, USA. *Hydrogeol J*  
276 22(5):1055-1066.

277 11. Wyrick GB, J. (1981) Hydrologic effects of stress-relief fracturing in an Appalachian valley. *USGS Water Supply Paper* 2177:53.

278 12. Heisig PM & Scott T (2013) Occurrence of Methane in Groundwater of South-Central New York State, 2012 -- Systematic Evaluation of Glaciated Region  
279 by Hydrogeologic Setting.

280 13. Nielsen DM & Nielsen GL (2006) Ground-Water Sampling. *Practical Handbook of Environmental Site Characterization and Groundwater Monitoring,*  
281 *Second Edition*, ed Nielsen D (CRC Taylor and Francis Group).

282 14. Puls R & Paul C (1995) Low-Flow Purging and Sampling of Ground-Water Monitoring Wells with Dedicated Systems. *Ground Water Monitoring and*  
283 *Remediation* 15(1):116-123.

284 15. Nicot JP, *et al.* (2017) Controls on Methane Occurrences in Shallow Aquifers Overlying the Haynesville Shale Gas Field, East Texas. *Groundwater*  
285 55(4):443-454.

286 16. Kampbell D & Vandegrift S (1998) Analysis of Dissolved Methane, Ethane, and Ethylene in Ground Water by a Standard Gas Chromatographic Technique.  
287 *J Chromatogr Sci* 36:235-256.

288 17. Hudson FH (2004) RSKSOP-175 Revision 2 Sample Preparation and Calculations for Dissolved Gas Analysis in Water Samples Using a GC Headspace  
289 Equilibration Technique.

290 18. Abbyad P, Tromp J, Lam J, & Salin E (2001) Optimization of the technique of standard additions for inductively coupled plasma mass spectrometry. *J Anal*  
291 *Atom Spectrom* 16(5):464-469.

292 19. Johnson JD, Graney JR, Capo RC, & Stewart BW (2015) Identification and quantification of regional brine and road salt sources in watersheds along the  
293 New York/Pennsylvania border, USA. *Appl Geochem* 60:37-50.

294 20. Chapman EC, *et al.* (2012) Geochemical and Strontium Isotope Characterization of Produced Waters from Marcellus Shale Natural Gas Extraction.  
295 *Environ Sci Technol* 46(6):3545-3553.

296 21. Osborn SG, McIntosh JC, Hanor JS, & Biddulph D (2012) Iodine-129, Sr-87/Sr-86, and Trace Elemental Geochemistry of Northern Appalachian Basin  
297 Brines: Evidence for Basinal-Scale Fluid Migration and Clay Mineral Diagenesis. *American Journal of Science* 312(3):263-287.

298  
299
